# Supplementary material for: Binding indirect greenhouse gases OCS and CS2by nitrogen heterocyclic carbenes (NHCs)
Source: Royal Society of Chemistry journal article supplement (doi:10.1039/c8cp03217c), 2018-01-01
Supplement: c8cp03217c1.pdf [file c8cp03217c1.pdf]

## Binding Indirect Greenhouse Gases OCS and CS<sub>2</sub> by Nitrogen Heterocyclic Carbenes (NHCs)

M. Merced Montero-Campillo,\* Ibon Alkorta,\* José Elguero

\*[mm.montero@uam.es](mailto:mm.montero@uam.es), [ibon@iqm.csic.es](mailto:ibon@iqm.csic.es)

### Supporting Information

**Table S1**, p. S2-S9. Non-covalent complexes, transition states and products for the reactions between NHC (**1-7**) + CS<sub>2</sub>.

**Table S2**, p. S10-S24. Non-covalent complexes, transition states and products for the reactions between NHC (**1-7**) + OCS. Molecular graphs obtained with QTAIM are also shown.

**Table S3**, p. S24. Dihedral angles (°) for the different NHC-CXY (NHC = (**1-7**)) products.

**Table S4**, p. S25. Chemical bonding analysis (EDA-ADF) for non-covalent complexes.

**Figure S1**, p. S26-S30. Energy paths for the NHC + CXY reactions obtained by IRC calculations.

**Figure S2**, p. S31. CO<sub>2</sub>, OCS and CS<sub>2</sub> LUMO orbitals.

**Figure S3**, p. S32. Stability of the TSs NHC/CXY (NHC=**1-7**, CXY = CS<sub>2</sub>, OCS) versus the stability of the TSs NHC/CO<sub>2</sub>.

**Figure S4**, p. S33. Stability of the TSs NHC/CXY (NHC=**1-7**, CXY = CO<sub>2</sub>, CS<sub>2</sub>, OCS) versus C···C distances.

**Figure S5**, p. S34. Relationship between the ΔH of the transition states NHC/CXY and products NHC-CXY (NHC = **1-7**, CXY = CO<sub>2</sub>, OCS, CS<sub>2</sub>) with respect to the energy of the HOMO in the isolated **1-7** carbenes. Results regarding CO<sub>2</sub> were taken from Ref. 3.

**Figure S6**, p. S35 Relationship between the ΔH of the transition states NHC/CXY and products NHC-CXY (NHC = **1-7**, CXY = CO<sub>2</sub>, OCS, CS<sub>2</sub>) with respect to the minimum of the MEP in the isolated **1-7** carbenes.

**Figure S7**, p. S36. E<sub>r</sub> (distortion energy) for the different CXY molecules at the NHC/CXY transition states from the distortion-interaction analysis.

**Figure S8**, p. S37-S42. Distortion-interaction analysis carried out along the path of the NHC + CXY reactions. Negative and positive values of the IRC correspond to the complexes and adducts, respectively.

**Table S1.** Non covalent complexes, transition states and products for the reactions between NHC (1-7) + CS<sub>2</sub>. Green and red points indicate the location of bond critical points and ring critical points, respectively, according to their definitions within the QTAIM (Quantum Theory of Atoms in Molecules) framework [see Bader, R.F.W. (1990) Atoms in molecules: a quantum theory. Oxford University Press, New York].

|                                                                                     |                                                                                                                                                                                                                                                                                                                                                                                                                                                                                                                                                                                                                                                                                                                                                                                                                                                                                                                     |
|-------------------------------------------------------------------------------------|---------------------------------------------------------------------------------------------------------------------------------------------------------------------------------------------------------------------------------------------------------------------------------------------------------------------------------------------------------------------------------------------------------------------------------------------------------------------------------------------------------------------------------------------------------------------------------------------------------------------------------------------------------------------------------------------------------------------------------------------------------------------------------------------------------------------------------------------------------------------------------------------------------------------|
| 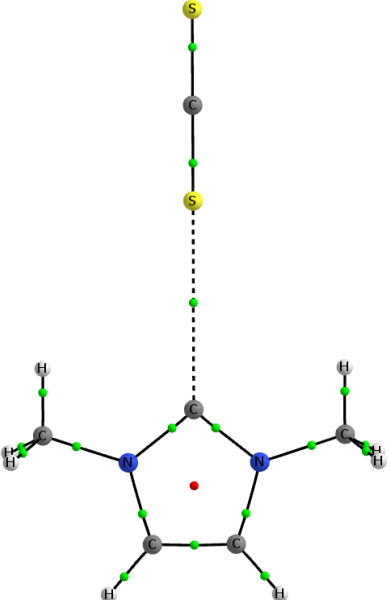  | <p><b>1:CS<sub>2</sub> NIMAG= 0</b><br/>           C,0.,0.,-3.5236036784<br/>           S,0.,0.,-1.9666406254<br/>           S,0.,0.,-5.0853806438<br/>           C,0.,0.,1.4302221212<br/>           N,0.,1.0618015956,2.2914374888<br/>           N,0.,-1.0618015956,2.2914374888<br/>           C,0.,0.6766271681,3.6250097703<br/>           C,0.,-0.6766271681,3.6250097703<br/>           H,0.,1.3819824841,4.4398014514<br/>           H,0.,-1.3819824841,4.4398014514<br/>           C,0.,2.441742715,1.844927647<br/>           H,0.,2.4386787081,0.7554968721<br/>           H,-0.8896373942,2.9695108748,2.2042762304<br/>           H,0.8896373942,2.9695108748,2.2042762304<br/>           C,0.,-2.441742715,1.844927647<br/>           H,0.,-2.4386787081,0.7554968721<br/>           H,0.8896373942,-2.9695108748,2.2042762304<br/>           H,-0.8896373942,-2.9695108748,2.2042762304</p>         |
|  | <p><b>2:CS<sub>2</sub> NIMAG= 0</b><br/>           C,-0.1796422237,3.4829393961,0.<br/>           S,-0.1101491282,1.9275702429,0.<br/>           S,-0.2495136343,5.0421936944,0.<br/>           C,0.0185076152,-1.4923874398,0.<br/>           N,1.083001727,-2.3203701159,0.<br/>           N,-1.0077714884,-2.4087396406,0.<br/>           N,0.7981118056,-3.671857438,0.<br/>           C,-0.5008023789,-3.6842076949,0.<br/>           H,-1.1038408973,-4.5789708312,0.<br/>           C,2.4737309975,-1.9155896233,0.<br/>           H,2.5025444347,-0.8269342592,0.<br/>           H,2.9799903516,-2.301284764,0.8889018765<br/>           H,2.9799903516,-2.301284764,-0.8889018765<br/>           C,-2.4171316748,-2.0586718857,0.<br/>           H,-2.4875583682,-0.9717637844,0.<br/>           H,-2.9168480432,-2.4519658159,-0.8903720913<br/>           H,-2.9168480432,-2.4519658159,0.8903720913</p> |

|  |                                                                                                                                                                                                                                                                                                                                                                                                                                                                                                                                                                                                                                                                                                                                                                                                                                                                                                                                 |
|--|---------------------------------------------------------------------------------------------------------------------------------------------------------------------------------------------------------------------------------------------------------------------------------------------------------------------------------------------------------------------------------------------------------------------------------------------------------------------------------------------------------------------------------------------------------------------------------------------------------------------------------------------------------------------------------------------------------------------------------------------------------------------------------------------------------------------------------------------------------------------------------------------------------------------------------|
|  | <p><b>3:CS<sub>2</sub> NIMAG= 0</b><br/> C,0.,0.,-3.1597797485<br/> S,0.,0.,-1.6028153822<br/> S,0.,0.,-4.7196291969<br/> C,0.,0.,1.854053277<br/> N,0.,1.0286212947,2.7321805538<br/> N,0.,-1.0286212947,2.7321805538<br/> N,0.,0.6336780696,4.0468628242<br/> N,0.,-0.6336780696,4.0468628242<br/> C,0.,2.4469713287,2.4261044486<br/> H,0.,2.5497894406,1.3423453634<br/> H,-0.8899454788,2.922380447,2.84491772<br/> H,0.8899454788,2.922380447,2.84491772<br/> C,0.,-2.4469713287,2.4261044486<br/> H,0.,-2.5497894406,1.3423453634<br/> H,0.8899454788,-2.922380447,2.84491772<br/> H,-0.8899454788,-2.922380447,2.84491772</p>                                                                                                                                                                                                                                                                                           |
|  | <p><b>4:CS<sub>2</sub> NIMAG= 0</b><br/> C,0.4992866955,-3.672721718,0.1215419701<br/> S,0.3657738194,-2.1224970676,0.0700166744<br/> S,0.6305247595,-5.2311815318,0.1737564123<br/> C,0.0728993366,1.1317683512,-0.0179276176<br/> C,-0.7919301231,3.2603645101,-0.0305748423<br/> N,0.5374607159,3.3800410717,-0.0331131654<br/> N,-1.074772564,1.9500889885,-0.0217113326<br/> C,1.06951483,2.0888087762,-0.0256564792<br/> H,2.1427094365,1.973693656,-0.0266330436<br/> H,-1.4893028606,4.0823616408,-0.0351922473<br/> C,1.2784398218,4.6289411662,-0.0486311369<br/> H,0.5858893119,5.4716144601,-0.0173297496<br/> H,1.9407664658,4.6835991703,0.8195837636<br/> H,1.8822732705,4.7004288166,-0.9576111542<br/> C,-2.4250930777,1.4121541022,-0.013246773<br/> H,-2.5746283089,0.8098853763,0.8854168621<br/> H,-3.157011342,2.2239411105,-0.0333938659<br/> H,-2.5681035446,0.7712338608,-0.8856249648</p>             |
|  | <p><b>5:CS<sub>2</sub> NIMAG= 0</b><br/> C,1.5915802801,3.3796273153,0.020713451<br/> S,1.0470230374,1.9213623779,0.0135958017<br/> S,2.1376195881,4.8448884972,0.0278556021<br/> C,-0.059659666,-1.193871668,-0.0019167539<br/> C,0.7919991879,-2.3457755243,-0.0163932309<br/> C,0.028522425,-3.4896885553,-0.0286335147<br/> N,-1.2896553999,-1.7410595617,-0.0023806987<br/> N,-1.2776610807,-3.1361099599,-0.0280018471<br/> C,-2.4546703688,-3.9718079099,0.0349665418<br/> H,-2.1332714193,-5.0127096689,-0.02347355<br/> H,-3.0019207346,-3.8306682669,0.97368432<br/> H,-3.1310552026,-3.7730393823,-0.8024892907<br/> C,-2.5567666814,-1.0391495698,-0.0103437163<br/> H,-2.3111433411,0.0203430486,0.0176506266<br/> H,-3.1314729997,-1.2527586943,-0.9183494882<br/> H,-3.1653345685,-1.2927961817,0.8645049861<br/> H,1.8709671226,-2.3209582115,-0.0215412088<br/> H,0.2900698215,-4.5380160844,-0.0394480302</p> |

|                                                                                     |                                                                                                                                                                                                                                                                                                                                                                                                                                                                                                                                                                                                                                                                                                                                                                                                                                                                                    |
|-------------------------------------------------------------------------------------|------------------------------------------------------------------------------------------------------------------------------------------------------------------------------------------------------------------------------------------------------------------------------------------------------------------------------------------------------------------------------------------------------------------------------------------------------------------------------------------------------------------------------------------------------------------------------------------------------------------------------------------------------------------------------------------------------------------------------------------------------------------------------------------------------------------------------------------------------------------------------------|
| 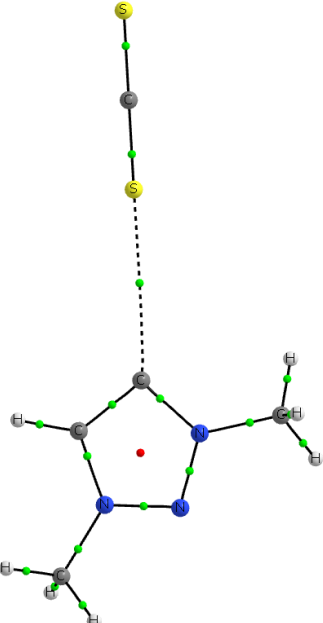   | <p><b>6:CS<sub>2</sub> NIMAG= 0</b><br/> C,-0.1593595232,3.7006740833,0.0978261627<br/> S,-0.0984629464,2.146961922,0.0258267522<br/> S,-0.2195632266,5.2609779713,0.1707738849<br/> C,-0.0203879687,-1.1735380491,-0.0776666324<br/> N,0.637583102,-3.3983001849,-0.0112013488<br/> N,-0.6757521098,-3.3295416794,0.0123381395<br/> N,0.9884786585,-2.1075585325,-0.0652741956<br/> C,-1.1158547329,-2.0388558602,-0.0257570444<br/> H,-2.174984407,-1.8339189075,-0.0150305184<br/> C,-1.4496739096,-4.5604040421,0.0148762792<br/> H,-0.8423514613,-5.3532858699,0.4500472818<br/> H,-2.3496049354,-4.4115751089,0.6137129932<br/> H,-1.7335835306,-4.8352225303,-1.0045412683<br/> C,2.4133735801,-1.8114794244,-0.0578769274<br/> H,2.7929874801,-1.7924921034,0.9676426745<br/> H,2.949100597,-2.5732900707,-0.6264131377<br/> H,2.5460903338,-0.8300316133,-0.509283095</p> |
|   | <p><b>7:CS<sub>2</sub> NIMAG= 0</b><br/> C,0.,0.,-3.9266381818<br/> S,0.,0.,-2.369784375<br/> S,0.,0.,-5.4929544045<br/> C,0.,0.,0.8498237543<br/> C,0.,1.0694410972,1.7485066425<br/> C,0.,-1.0694410972,1.7485066425<br/> N,0.,0.6786562119,3.0610326642<br/> N,0.,-0.6786562119,3.0610326642<br/> C,0.,-1.4640885696,4.2754595557<br/> H,0.,-2.5131345118,3.977134367<br/> H,0.8923979417,-1.2751666704,4.8814635053<br/> H,-0.8923979417,-1.2751666704,4.8814635053<br/> C,0.,1.4640885696,4.2754595557<br/> H,0.,2.5131345118,3.977134367<br/> H,-0.8923979417,1.2751666704,4.8814635053<br/> H,0.8923979417,1.2751666704,4.8814635053<br/> H,0.,-2.139908469,1.5737180284<br/> H,0.,2.139908469,1.5737180284</p>                                                                                                                                                             |
|  | <p><b>1-CS<sub>2</sub> NIMAG= 0</b><br/> C,0.,0.,1.0450221014<br/> S,1.481449595,0.4318869459,1.7012534267<br/> S,-1.481449595,-0.4318869459,1.7012534267<br/> C,0.,0.,-0.4357181506<br/> N,-0.1515772818,1.073790049,-1.2340698134<br/> N,0.1515772818,-1.073790049,-1.2340698134<br/> C,-0.0937676356,0.6709298036,-2.5574240491<br/> C,0.0937676356,-0.6709298036,-2.5574240491<br/> H,-0.1902447581,1.3718804522,-3.3678371065<br/> H,0.1902447581,-1.3718804522,-3.3678371065<br/> C,-0.3062602845,2.440647392,-0.7503066882<br/> H,-1.0796461563,2.4646655638,0.0193454831<br/> H,0.6353040497,2.7925722312,-0.3233732548<br/> H,-0.6013830272,3.0726932812,-1.588084473<br/> C,0.3062602845,-2.440647392,-0.7503066882<br/> H,1.0796461563,-2.4646655638,0.0193454831<br/> H,-0.6353040497,-2.7925722312,-0.3233732548<br/> H,0.6013830272,-3.0726932812,-1.588084473</p>   |

|                                                                                     |                                                                                                                                                                                                                                                                                                                                                                                                                                                                                                                                                                                                                                                                                                                                                                                                                                                                                                                              |
|-------------------------------------------------------------------------------------|------------------------------------------------------------------------------------------------------------------------------------------------------------------------------------------------------------------------------------------------------------------------------------------------------------------------------------------------------------------------------------------------------------------------------------------------------------------------------------------------------------------------------------------------------------------------------------------------------------------------------------------------------------------------------------------------------------------------------------------------------------------------------------------------------------------------------------------------------------------------------------------------------------------------------|
| 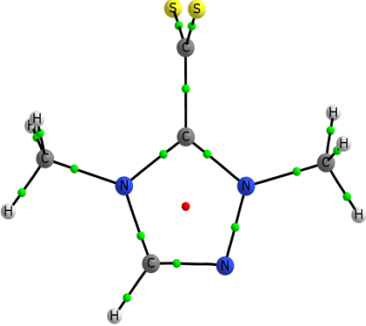   | <p><b>2-CS<sub>2</sub> NIMAG= 0</b><br/> C,0.0857413292,-1.0397037443,-0.078998073<br/> S,0.4320718733,-1.5761865594,-1.6267897775<br/> S,-0.1821499319,-1.78475285,1.3973653953<br/> C,-0.0239451509,0.4319730063,-0.0011055068<br/> N,0.9600250314,1.3210521089,0.1557918812<br/> N,-1.1622308249,1.162531946,-0.0800003602<br/> N,0.4931915397,2.6071433198,0.1752721546<br/> C,-0.7935762719,2.4769170297,0.0324534579<br/> H,-1.495920196,3.2939276745,0.0064799088<br/> C,2.382818875,1.037171797,0.2520394126<br/> H,2.8655679843,1.9262631161,0.6541701232<br/> H,2.5289631802,0.186827013,0.9197786117<br/> H,2.7818464824,0.7981436839,-0.7364252661<br/> C,-2.5039085845,0.6127697585,-0.2351943454<br/> H,-2.5374836293,-0.0080152952,-1.1325065189<br/> H,-2.749666502,0.0029283892,0.6363452545<br/> H,-3.2076362042,1.4400086059,-0.328676352</p>                                                             |
|   | <p><b>3-CS<sub>2</sub> NIMAG= 0</b><br/> C,0.,0.,1.5674948255<br/> S,1.5010752822,0.3823350302,2.1998446218<br/> S,-1.5010752822,-0.3823350302,2.1998446218<br/> C,0.,0.,0.0918496333<br/> N,-0.1053418194,1.0493634362,-0.7357830585<br/> N,0.1053418194,-1.0493634362,-0.7357830585<br/> N,-0.0634457397,0.6329233512,-2.0291503924<br/> N,0.0634457397,-0.6329233512,-2.0291503924<br/> C,-0.2244512175,2.4559200723,-0.3845925613<br/> H,-1.1178489347,2.5998223655,0.2260249211<br/> H,0.6598796783,2.7584129728,0.1796735937<br/> H,-0.3023580072,3.01535364,-1.3153433082<br/> C,0.2244512175,-2.4559200723,-0.3845925613<br/> H,1.1178489347,-2.5998223655,0.2260249211<br/> H,-0.6598796783,-2.7584129728,0.1796735937<br/> H,0.3023580072,-3.01535364,-1.3153433082</p>                                                                                                                                            |
|  | <p><b>4-CS<sub>2</sub> NIMAG= 0</b><br/> C,0.5004218187,1.857732606,0.3123481789<br/> S,-0.2263493399,2.9775717477,-0.7058281255<br/> S,1.6575663646,2.0448737172,1.5248695027<br/> C,-0.0021369409,0.4713516914,0.1402749478<br/> C,0.0158925103,-1.7317685497,-0.1878136818<br/> N,-1.2541580835,-1.3638614091,0.0004422963<br/> N,0.7926100697,-0.6467234971,-0.1033930669<br/> C,-1.2888260601,0.0001763253,0.1959008996<br/> H,-2.2063560353,0.5408544416,0.3436963825<br/> H,0.3542602376,-2.7325559722,-0.3933953264<br/> C,-2.4071919243,-2.2534930464,-0.0005140631<br/> H,-2.0809535392,-3.2648391146,-0.2450006647<br/> H,-2.8785232585,-2.2552935423,0.98495296<br/> H,-3.1303552798,-1.9188037572,-0.7472386699<br/> C,2.2446203492,-0.655669293,-0.2746227616<br/> H,2.5193309447,0.0648379485,-1.0462276645<br/> H,2.7137199921,-0.3551853391,0.662618806<br/> H,2.5490961746,-1.6594429573,-0.5760699491</p> |

|                                                                                     |                                                                                                                                                                                                                                                                                                                                                                                                                                                                                                                                                                                                                                                                                                                                                                                                                                                                                                                |
|-------------------------------------------------------------------------------------|----------------------------------------------------------------------------------------------------------------------------------------------------------------------------------------------------------------------------------------------------------------------------------------------------------------------------------------------------------------------------------------------------------------------------------------------------------------------------------------------------------------------------------------------------------------------------------------------------------------------------------------------------------------------------------------------------------------------------------------------------------------------------------------------------------------------------------------------------------------------------------------------------------------|
| 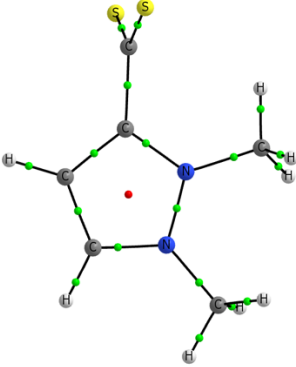   | <p><b>5-CS<sub>2</sub> NIMAG= 0</b><br/> C,-1.4246821764,0.0772789747,0.0641327033<br/> S,-2.0913118276,-0.3116607834,1.5511716235<br/> S,-2.0372709936,0.1735311887,-1.493968095<br/> C,0.0224981015,0.393225313,0.1385165213<br/> C,0.6805610841,1.6106908344,0.3970412864<br/> C,2.0274516863,1.3529207285,0.317902621<br/> N,0.9764550868,-0.5384487611,-0.0694131563<br/> N,2.2142970177,0.0477862352,0.0183469774<br/> C,3.4466096334,-0.7082249327,-0.0486294494<br/> H,4.2689083597,0.0063076166,-0.0079698862<br/> H,3.5376069366,-1.401233955,0.7938824829<br/> H,3.5126065787,-1.2643078113,-0.9872800207<br/> C,0.7985753405,-1.9304558752,-0.4407506157<br/> H,-0.2619451384,-2.151239251,-0.3313896064<br/> H,1.0931727379,-2.095210521,-1.4809265824<br/> H,1.3728795107,-2.5788580928,0.2248225295<br/> H,0.1986010941,2.5497091504,0.6054048<br/> H,2.881338968,1.9975759421,0.4541058667</p> |
|   | <p><b>6-CS<sub>2</sub> NIMAG= 0</b><br/> C,0.4829287738,1.9213358763,0.0093971228<br/> S,-0.2327017352,2.8625016512,-1.1825404162<br/> S,1.614651226,2.2749310757,1.2011084219<br/> C,-0.0204814015,0.5267942359,0.0160882666<br/> N,0.0094373587,-1.7226530097,-0.0600903545<br/> N,-1.2326042398,-1.2941752945,0.0538148108<br/> N,0.7333952627,-0.6107573152,-0.0716431133<br/> C,-1.3174779527,0.0532825091,0.0947442323<br/> H,-2.2467819934,0.5911964662,0.1546312081<br/> C,-2.3154783948,-2.2677020451,0.1203607494<br/> H,-1.8885002664,-3.2512140299,-0.0682837831<br/> H,-2.7732776911,-2.2428031787,1.1113621001<br/> H,-3.0628076778,-2.0306829492,-0.6386956321<br/> C,2.184228403,-0.7187455044,-0.1896694386<br/> H,2.6374912492,-0.3297570069,0.7228331269<br/> H,2.4188009657,-1.7699818361,-0.3499748377<br/> H,2.5179461139,-0.1131746449,-1.0334424636</p>                                |
|  | <p><b>7-CS<sub>2</sub> NIMAG= 0</b><br/> C,0.,0.,2.3046994773<br/> S,0.0012652564,1.5265888773,3.0201658206<br/> S,-0.0012652564,-1.5265888773,3.0201658206<br/> C,0.,0.,0.816023997<br/> C,0.0009195646,1.1019759886,-0.0361044518<br/> C,-0.0009195646,-1.1019759886,-0.0361044518<br/> N,0.0005648084,0.6824142403,-1.3170746383<br/> N,-0.0005648084,-0.6824142403,-1.3170746383<br/> C,-0.001270989,-1.470507004,-2.5356344414<br/> H,-0.002006591,-2.5185546567,-2.2384606043<br/> H,-0.895583135,-1.2711709884,-3.1322643779<br/> H,0.8932113175,-1.2724824739,-3.1324431972<br/> C,0.001270989,1.470507004,-2.5356344414<br/> H,0.002006591,2.5185546567,-2.2384606043<br/> H,0.895583135,1.2711709884,-3.1322643779<br/> H,-0.8932113175,1.2724824739,-3.1324431972<br/> H,0.0017969575,2.1475961542,0.2285455478<br/> H,-0.0017969575,-2.1475961542,0.2285455478</p>                                 |

|                                                                                     |                                                                                                                                                                                                                                                                                                                                                                                                                                                                                                                                                                                                                                                                                                                                                                                                                                                                                                                                 |
|-------------------------------------------------------------------------------------|---------------------------------------------------------------------------------------------------------------------------------------------------------------------------------------------------------------------------------------------------------------------------------------------------------------------------------------------------------------------------------------------------------------------------------------------------------------------------------------------------------------------------------------------------------------------------------------------------------------------------------------------------------------------------------------------------------------------------------------------------------------------------------------------------------------------------------------------------------------------------------------------------------------------------------|
| 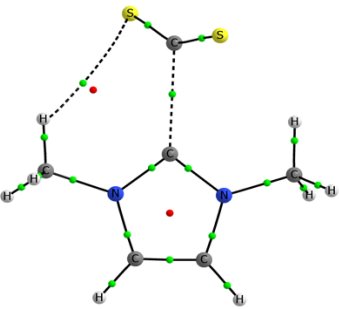   | <p><b>1/CS<sub>2</sub>, NIMAG= 1</b><br/> C,0.1318620436,-0.0370327698,1.7210548066<br/> S,1.6219095108,0.5000057494,1.9166669271<br/> S,-1.2511728705,-0.5877504633,2.2912691062<br/> C,-0.1060829363,0.0003230884,-0.5644194404<br/> N,-0.0407805672,1.0752279678,-1.3873805122<br/> N,-0.0511747093,-1.0606430256,-1.4059027477<br/> C,0.0536323119,0.6949979741,-2.7195357585<br/> C,0.048475697,-0.658414719,-2.7314438358<br/> H,0.1060665463,1.4085320193,-3.5248977094<br/> H,0.1044442093,-1.3584031869,-3.5483564891<br/> C,-0.0778326936,2.4550775907,-0.9301025572<br/> H,-0.1468571724,2.4541194606,0.1560962339<br/> H,0.8331163327,2.9811620651,-1.2295278384<br/> H,-0.9451961749,2.9733400473,-1.3493085856<br/> C,-0.0645902553,-2.4478805075,-0.9682050333<br/> H,-0.3026988773,-2.4695791282,0.0941630383<br/> H,-0.8247386707,-3.0089594737,-1.51882877<br/> H,0.911618276,-2.9141226886,-1.1316028346</p> |
|   | <p><b>2/CS<sub>2</sub>, NIMAG= 1</b><br/> C,-2.1638348618,-0.2244512437,0.1793822651<br/> S,-2.5293073505,-1.0175351885,1.5142454295<br/> S,-2.5977992515,0.4935039656,-1.1831746383<br/> C,0.0619515518,-0.0147872133,0.1469698503<br/> N,0.9764781051,-0.9640333802,-0.080949849<br/> N,0.786332519,1.1324606926,0.0097179221<br/> N,2.2406582721,-0.4868149208,-0.3580874276<br/> C,2.0840387496,0.8017683752,-0.2896842188<br/> H,2.8690352802,1.524755951,-0.445853764<br/> C,0.7567892476,-2.3991223975,-0.0869006302<br/> H,-0.2537612587,-2.5877538644,0.2725721476<br/> H,0.8745120803,-2.7916174985,-1.0998918089<br/> H,1.4839206811,-2.8798494462,0.5705041381<br/> C,0.2584104785,2.4787332088,0.1835633317<br/> H,0.9634304638,3.1952099837,-0.2418862667<br/> H,-0.6984839961,2.5563853896,-0.3342536205<br/> H,0.1148468696,2.7009799565,1.2437271396</p>                                                       |
|  | <p><b>3/CS<sub>2</sub>, NIMAG= 1</b><br/> C,-0.0267930196,0.0015600544,2.1501231423<br/> S,1.2642472157,0.8438504621,2.5833041291<br/> S,-1.3275092253,-0.8401658771,2.5544988055<br/> C,-0.0017723582,0.0001012609,-0.0162677168<br/> N,-0.0314034729,1.036476411,-0.8669408258<br/> N,0.0474623791,-1.0374112334,-0.8646425815<br/> N,-0.0036464077,0.6324520817,-2.1772861788<br/> N,0.0499518739,-0.6351417021,-2.1758192432<br/> C,-0.1167925777,2.453498204,-0.5492637035<br/> H,0.4416267265,2.6348218933,0.3692139844<br/> H,0.3164658065,3.0130827281,-1.3779960956<br/> H,-1.1596310041,2.7487697039,-0.4116491565<br/> C,0.1254772705,-2.4540050101,-0.543183038<br/> H,-0.4539969526,-2.6341097352,0.3624015721<br/> H,-0.288543561,-3.0147055733,-1.3809459346<br/> H,1.1648573069,-2.7490736683,-0.381138193</p>                                                                                                  |

|                                                                                     |                                                                                                                                                                                                                                                                                                                                                                                                                                                                                                                                                                                                                                                                                                                                                                                                                                                                                                              |
|-------------------------------------------------------------------------------------|--------------------------------------------------------------------------------------------------------------------------------------------------------------------------------------------------------------------------------------------------------------------------------------------------------------------------------------------------------------------------------------------------------------------------------------------------------------------------------------------------------------------------------------------------------------------------------------------------------------------------------------------------------------------------------------------------------------------------------------------------------------------------------------------------------------------------------------------------------------------------------------------------------------|
| 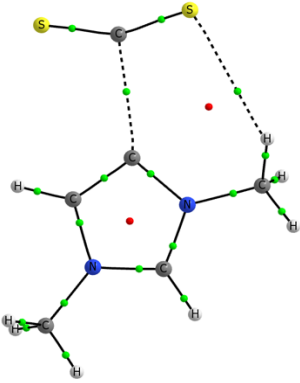   | <p><b>4/CS<sub>2</sub> NIMAG= 1</b><br/> C,-0.7913741762,-1.558197288,-0.2239122457<br/> S,-2.2805625339,-1.3053764616,0.2525493358<br/> S,0.409739047,-2.4084100934,-0.8195977462<br/> C,0.1480235124,0.67854621,0.1354642264<br/> C,1.3848118825,2.5850565299,0.0210539783<br/> N,0.0991491264,2.9472213152,0.0124072413<br/> N,1.4274738291,1.2473442439,0.0887340862<br/> C,-0.6653726407,1.7861339261,0.0795667467<br/> H,-1.7418100309,1.8519938895,0.0783751661<br/> H,2.2225621841,3.2624677178,-0.0179688029<br/> C,-0.3986742766,4.3108450813,-0.067396625<br/> H,0.4399609955,5.0073219943,-0.1103960212<br/> H,-1.010676676,4.4354601597,-0.9644460416<br/> H,-1.0064797767,4.5402478251,0.8116328241<br/> C,2.6557938602,0.4674844148,0.1592219269<br/> H,2.529901823,-0.4311122378,-0.444919162<br/> H,3.4955124336,1.0568296327,-0.21673829<br/> H,2.8558865373,0.1685898005,1.1916357729</p> |
|   | <p><b>5/CS<sub>2</sub> NIMAG= 1</b><br/> C,-0.0116237065,2.8124490819,0.<br/> S,1.5626245223,3.0434039115,0.<br/> S,-1.5249691949,3.2807505124,0.<br/> C,-0.3347807928,0.4047017661,0.<br/> C,-1.6333873272,-0.1661347172,0.<br/> C,-1.5121626005,-1.537512995,0.<br/> N,0.4916179857,-0.6522647008,0.<br/> N,-0.1982442236,-1.8583776772,0.<br/> C,0.4330444653,-3.1597299861,0.<br/> H,-0.3547698784,-3.913928701,0.<br/> H,1.0518130954,-3.3031400503,-0.8913872064<br/> H,1.0518130954,-3.3031400503,0.8913872064<br/> C,1.941992388,-0.6362851739,0.<br/> H,2.3446638707,-1.1248022742,-0.8930243409<br/> H,2.2333721784,0.4140256261,0.<br/> H,2.3446638707,-1.1248022742,0.8930243409<br/> H,-2.5555711055,0.3935285695,0.<br/> H,-2.2485071247,-2.3276503941,0.</p>                                                                                                                                  |
|  | <p><b>6/CS<sub>2</sub> NIMAG= 1</b><br/> C,-0.7541757966,-1.5098405122,-0.1715516065<br/> S,-2.315345856,-1.2041921996,-0.1882320763<br/> S,0.4947286787,-2.4969212687,-0.1975309492<br/> C,0.11655476,0.6724184999,-0.0420746188<br/> N,1.3564166214,2.5983576079,0.0825162732<br/> N,0.0737065762,2.8977476671,0.050486163<br/> N,1.3467578053,1.2650222981,0.0255714232<br/> C,-0.7088434782,1.7884965057,-0.0244286923<br/> H,-1.7837127573,1.860606665,-0.0578843692<br/> C,-0.3275327031,4.2970026877,0.0711369141<br/> H,0.5462197318,4.8971693905,0.3201226752<br/> H,-0.7114069957,4.5908726406,-0.9087226758<br/> H,-1.1048204005,4.439708189,0.8240657871<br/> C,2.6314512852,0.5757243281,0.0498830052<br/> H,2.4246142829,-0.4906507028,-0.0284013577<br/> H,3.2450265846,0.9069687162,-0.7903857525<br/> H,3.1514017059,0.7926822861,0.985429866</p>                                           |



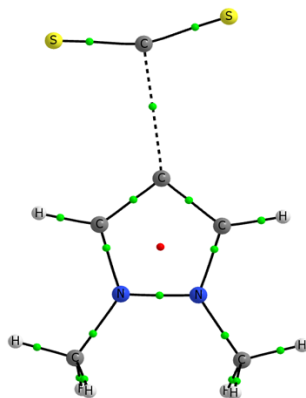

7/CS<sub>2</sub>, NIMAG= 1

C,-0.000020303,0.1248963437,3.1987135863  
 S,0.0000835847,1.7034802976,3.2998256391  
 S,-0.000084837,-1.379341457,3.6769320496  
 C,-0.0000100966,-0.1230892525,0.6557704876  
 C,0.0000519515,0.9851526224,-0.1850060786  
 C,-0.0000647266,-1.1640318508,-0.2679824485  
 N,0.0000360604,0.6411557401,-1.5052926877  
 N,-0.0000376804,-0.7171977096,-1.5593917109  
 C,-0.0000750515,-1.453368333,-2.8060994963  
 H,-0.0001332317,-2.5134082765,-2.5507230042  
 H,-0.8928877098,-1.2384757902,-3.4020735744  
 H,0.8927635089,-1.2385728791,-3.4020697705  
 C,0.0000838387,1.4734683976,-2.6901531444  
 H,0.0001394748,2.5099762345,-2.3518657606  
 H,0.8929088238,1.3056759545,-3.3009427151  
 H,-0.8927567852,1.3057730442,-3.300946519  
 H,0.0001089134,2.0422197123,0.0556600132  
 H,-0.000123415,-2.2376511875,-0.1206338042

**Table S2.** Non covalent complexes, transition states and products for the reactions between NHC (1-7) + OCS. Green and red points indicate the location of bond critical points and ring critical points, respectively, according to their definitions within the QTAIM (Quantum Theory of Atoms in Molecules) framework [see Bader, R.F.W. (1990) Atoms in molecules: a quantum theory. Oxford University Press, New York].

|                                                                                     |                                                                                                                                                                                                                                                                                                                                                                                                                                                                                                                                                                                                                                                                                                                                                                                                                                                                                                                                                                                                                                                                                                         |
|-------------------------------------------------------------------------------------|---------------------------------------------------------------------------------------------------------------------------------------------------------------------------------------------------------------------------------------------------------------------------------------------------------------------------------------------------------------------------------------------------------------------------------------------------------------------------------------------------------------------------------------------------------------------------------------------------------------------------------------------------------------------------------------------------------------------------------------------------------------------------------------------------------------------------------------------------------------------------------------------------------------------------------------------------------------------------------------------------------------------------------------------------------------------------------------------------------|
| 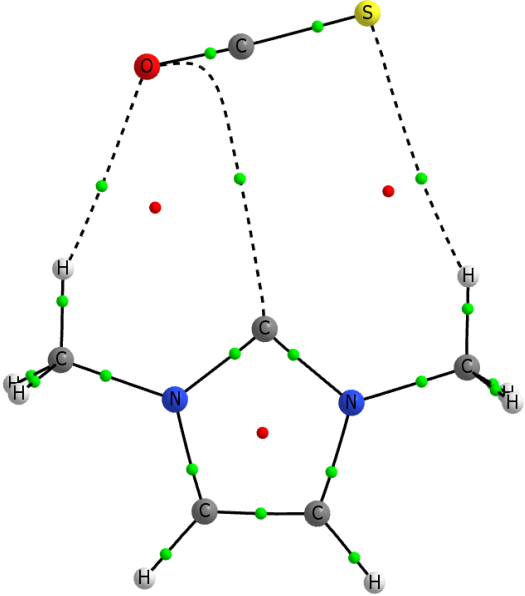  | <p>1:OCS (TB) NIMAG= 0<br/>           C,-0.0064507169,-0.2220037167,3.1294331434<br/>           S,0.0362961435,1.2961664392,3.5182491006<br/>           O,-0.0382963128,-1.3548632008,2.8962537722<br/>           C,0.0013141189,0.0436294227,-0.2521406981<br/>           N,0.0310738269,1.0827688799,-1.1417096026<br/>           N,-0.0297644894,-1.0388234524,-1.0881328134<br/>           C,0.0189945514,0.6648000457,-2.4651749589<br/>           C,-0.0197763142,-0.6876425723,-2.4309827448<br/>           H,0.0385672646,1.3490610732,-3.2976094878<br/>           H,-0.0406225236,-1.4129342296,-3.2278884765<br/>           C,0.0709645125,2.4720164274,-0.7280200737<br/>           H,0.0716210114,2.4917184313,0.3613731407<br/>           H,0.9750593545,2.9661396132,-1.099524162<br/>           H,-0.8033765833,3.0171616777,-1.0993750464<br/>           C,-0.0689467762,-2.4065795275,-0.6058561645<br/>           H,-0.0679650478,-2.3744528086,0.4828117278<br/>           H,-0.9734012669,-2.9175945984,-0.952769702<br/>           H,0.8047092474,-2.9685679041,-0.9528678667</p> |
|  | <p>1:OCS (YB) NIMAG= 0<br/>           C,0.,0.,-3.4799372909<br/>           S,0.,0.,-1.9076110587<br/>           O,0.,0.,-4.6404556376<br/>           C,0.,0.,1.3943122329<br/>           N,0.,1.0619474917,2.2547798028<br/>           N,0.,-1.0619474917,2.2547798028<br/>           C,0.,0.6766569693,3.5882887115<br/>           C,0.,-0.6766569693,3.5882887115<br/>           H,0.,1.3820647369,4.4029998331<br/>           H,0.,-1.3820647369,4.4029998331<br/>           C,0.,2.4420740443,1.8083561184<br/>           H,0.,2.4395701041,0.7189183633<br/>           H,-0.8896625393,2.9695323497,2.168013663<br/>           H,0.8896625393,2.9695323497,2.168013663<br/>           C,0.,-2.4420740443,1.8083561184<br/>           H,0.,-2.4395701041,0.7189183633<br/>           H,0.8896625393,-2.9695323497,2.168013663<br/>           H,-0.8896625393,-2.9695323497,2.168013663</p>                                                                                                                                                                                                          |

|                                                                                     |                                                                                                                                                                                                                                                                                                                                                                                                                                                                                                                                                                                                                                                                                                                                 |
|-------------------------------------------------------------------------------------|---------------------------------------------------------------------------------------------------------------------------------------------------------------------------------------------------------------------------------------------------------------------------------------------------------------------------------------------------------------------------------------------------------------------------------------------------------------------------------------------------------------------------------------------------------------------------------------------------------------------------------------------------------------------------------------------------------------------------------|
| 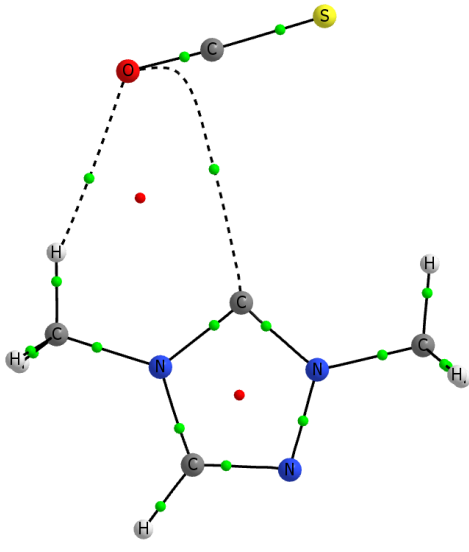   | <p>2:OCS (TB-A) NIMAG= 0<br/> C,-3.1092088768,-0.2804531411,0.<br/> S,-3.536842621,1.2267132996,0.<br/> O,-2.8394612275,-1.4063294105,0.<br/> C,0.263026814,0.0700856691,0.<br/> N,1.166805538,1.0719454285,0.<br/> N,1.1045850388,-1.0194043381,0.<br/> N,2.4946768631,0.6910044711,0.<br/> C,2.4130527908,-0.605554388,0.<br/> H,3.2621281144,-1.2714715649,0.<br/> C,0.8611391744,2.4873791642,0.<br/> H,-0.2231077333,2.5904826452,0.<br/> H,1.2812688755,2.9659389479,0.8888211734<br/> H,1.2812688755,2.9659389479,-0.8888211734<br/> C,0.6523196999,-2.4000002875,0.<br/> H,-0.4366785971,-2.3901566006,0.<br/> H,1.0098472604,-2.9266734723,-0.890099167<br/> H,1.0098472604,-2.9266734723,0.890099167</p>              |
|   | <p>2:OCS (TB-B) NIMAG= 0<br/> C,-3.112391842,0.2667249823,0.<br/> S,-3.5367233302,-1.2423735949,0.<br/> O,-2.8461842448,1.3927723723,0.<br/> C,0.2576633995,-0.0593386671,0.<br/> N,1.0843770658,1.0069027758,0.<br/> N,1.177824391,-1.0833890029,0.<br/> N,2.4368728561,0.7251893107,0.<br/> C,2.452073393,-0.5737517698,0.<br/> H,3.3482958613,-1.1747208792,0.<br/> C,0.6741635316,2.3964532471,0.<br/> H,-0.4144305148,2.4198274732,0.<br/> H,1.0593385147,2.9039081605,0.8886247663<br/> H,1.0593385147,2.9039081605,-0.8886247663<br/> C,0.8287190345,-2.4926137825,0.<br/> H,-0.2584456787,-2.5612407316,0.<br/> H,1.2220881475,-2.9927430785,-0.8902873631<br/> H,1.2220881475,-2.9927430785,0.8902873631</p>           |
|  | <p>2:OCS (YB) NIMAG= 0<br/> C,-0.1774413626,3.4416090177,0.<br/> S,-0.1117848026,1.8713729282,0.<br/> O,-0.2261537655,4.6006375186,0.<br/> C,0.0159914923,-1.454674678,0.<br/> N,1.0814101159,-2.2809679887,0.<br/> N,-1.0095708629,-2.3713493071,0.<br/> N,0.7975756295,-3.6326026005,0.<br/> C,-0.5013508733,-3.6462835888,0.<br/> H,-1.1035501206,-4.5416067804,0.<br/> C,2.4717271588,-1.8744734881,0.<br/> H,2.4993522211,-0.7857791578,0.<br/> H,2.9782594887,-2.2597250991,0.8889168645<br/> H,2.9782594887,-2.2597250991,-0.8889168645<br/> C,-2.4192772652,-2.0222209299,0.<br/> H,-2.4906778542,-0.9353791989,0.<br/> H,-2.9184986407,-2.4160610415,-0.8903832611<br/> H,-2.9184986407,-2.4160610415,0.8903832611</p> |

|                                                                                     |                                                                                                                                                                                                                                                                                                                                                                                                                                                                                                                                                                                                                                                                                                                                                                                                                                                                                                                    |
|-------------------------------------------------------------------------------------|--------------------------------------------------------------------------------------------------------------------------------------------------------------------------------------------------------------------------------------------------------------------------------------------------------------------------------------------------------------------------------------------------------------------------------------------------------------------------------------------------------------------------------------------------------------------------------------------------------------------------------------------------------------------------------------------------------------------------------------------------------------------------------------------------------------------------------------------------------------------------------------------------------------------|
| 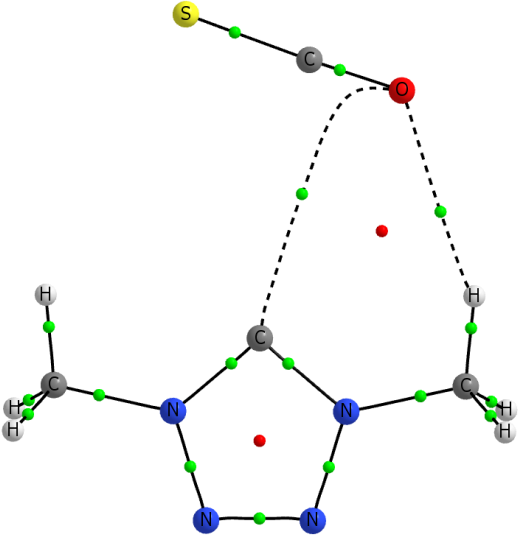   | <p>3:OCS (TB) NIMAG= 0<br/> C,-0.0093803727,-0.3264486565,3.2060777118<br/> S,0.0333930546,1.1673959011,3.6757035595<br/> O,-0.0412999699,-1.441796546,2.8971012235<br/> C,0.0024723613,0.0858207363,-0.168241938<br/> N,0.030638765,1.0684120554,-1.0981409955<br/> N,-0.0282302799,-0.985182544,-0.9947812036<br/> N,0.017460587,0.6085219995,-2.3914164256<br/> N,-0.0188119668,-0.6568364403,-2.3275828688<br/> C,0.0716325283,2.4988877618,-0.8611557747<br/> H,0.076095102,2.651689273,0.2167634349<br/> H,0.9741156716,2.9286870815,-1.3021970355<br/> H,-0.8048382807,2.9796513606,-1.3020508965<br/> C,-0.0683800847,-2.3854886297,-0.6151693703<br/> H,-0.0696026808,-2.4302459987,0.4723992262<br/> H,-0.9719135327,-2.8560247019,-1.0100738443<br/> H,0.8066490983,-2.907042652,-1.0101763173</p>                                                                                                      |
|   | <p>3:OCS (TB) NIMAG= 0<br/> C,0.,0.,-3.1204420054<br/> S,0.,0.,-1.5491913161<br/> O,0.,0.,-4.2798631525<br/> C,0.,0.,1.8138929875<br/> N,0.,1.0288548048,2.6916590209<br/> N,0.,-1.0288548048,2.6916590209<br/> N,0.,0.6337005824,4.006019379<br/> N,0.,-0.6337005824,4.006019379<br/> C,0.,2.4470923089,2.3849607247<br/> H,0.,2.5493594621,1.301164216<br/> H,-0.8899340904,2.9226826697,2.8036207538<br/> H,0.8899340904,2.9226826697,2.8036207538<br/> C,0.,-2.4470923089,2.3849607247<br/> H,0.,-2.5493594621,1.301164216<br/> H,0.8899340904,-2.9226826697,2.8036207538<br/> H,-0.8899340904,-2.9226826697,2.8036207538</p>                                                                                                                                                                                                                                                                                  |
|  | <p>4:OCS (TB-A) NIMAG= 0<br/> C,1.9946658516,2.6714047512,-0.057608109<br/> S,3.453756579,2.0938979517,-0.0609267778<br/> O,0.9507187436,3.1701818937,-0.0580735042<br/> C,0.2100738372,0.0436360864,0.0308534145<br/> C,-1.1461782582,-1.8126553494,0.0200530431<br/> N,-1.9465307327,-0.7447225318,-0.0189252151<br/> N,0.1166337919,-1.3629753429,0.0486656584<br/> C,-1.1282991154,0.38673063,-0.0123445104<br/> H,-1.5911786504,1.3611130217,-0.0426444639<br/> H,-1.479181041,-2.8379760565,0.0258665727<br/> C,-3.3974968205,-0.7720573814,-0.0664363973<br/> H,-3.7501562653,-1.8047433232,-0.0619203882<br/> H,-3.8134323528,-0.2525682481,0.8013130991<br/> H,-3.7550845495,-0.2802730139,-0.9753695228<br/> C,1.2838137261,-2.2265712421,0.1116178216<br/> H,1.7872859265,-2.1043666027,1.073858992<br/> H,0.9906289481,-3.2724399001,-0.0138726666<br/> H,1.9805933818,-1.9436103426,-0.6791070461</p> |

|  |                                                                                                                                                                                                                                                                                                                                                                                                                                                                                                                                                                                                                                                                                                                                                                                                                                                                                                                  |
|--|------------------------------------------------------------------------------------------------------------------------------------------------------------------------------------------------------------------------------------------------------------------------------------------------------------------------------------------------------------------------------------------------------------------------------------------------------------------------------------------------------------------------------------------------------------------------------------------------------------------------------------------------------------------------------------------------------------------------------------------------------------------------------------------------------------------------------------------------------------------------------------------------------------------|
|  | <p>4:OCS (TB-B) NIMAG= 0<br/> C,2.546923964,2.1619574314,-0.3008474537<br/> S,1.9037297281,3.5334025539,0.1008728206<br/> O,3.086474499,1.1863873752,-0.6147053248<br/> C,-0.0378295167,0.2619743561,0.2244929826<br/> C,-1.1356563677,-1.7466071849,0.0012766309<br/> N,-2.0690171249,-0.7920592114,0.0201063229<br/> N,0.0553997941,-1.1424306676,0.1180007336<br/> C,-1.4089700189,0.4303970318,0.1554292243<br/> H,-1.9986998684,1.3337952429,0.1859025005<br/> H,-1.3308448923,-2.8026359306,-0.093824635<br/> C,-3.5008386347,-1.0023608474,-0.0980986657<br/> H,-3.7134062863,-2.0687789137,-0.1896947948<br/> H,-4.0131677426,-0.6147014632,0.786815173<br/> H,-3.8872693891,-0.4875759134,-0.9821961581<br/> C,1.321707926,-1.8555016754,0.1765393006<br/> H,1.6241064131,-2.0188113323,1.2156537072<br/> H,1.2403100455,-2.8223098508,-0.3281624416<br/> H,2.077680472,-1.2421360006,-0.3125599226</p> |
|  | <p>4:OCS (YB) NIMAG= 0<br/> C,0.4997963654,-3.6414591033,0.1211636457<br/> S,0.3449102932,-2.0761180378,0.0725091998<br/> O,0.6131229821,-4.7974407859,0.1571451012<br/> C,0.0713469505,1.097692733,-0.0138186796<br/> C,-0.7884123403,3.2274149136,-0.0311011129<br/> N,0.5412981002,3.3439717349,-0.0319107062<br/> N,-1.0745029386,1.917892978,-0.0204140979<br/> C,1.0704962172,2.0517173447,-0.0215337127<br/> H,2.1432969924,1.9334082007,-0.0207489422<br/> H,-1.4838657589,4.0510042792,-0.0380103002<br/> C,1.2851404577,4.5911780347,-0.0483603008<br/> H,0.5943731245,5.4354231063,-0.0200452153<br/> H,1.9458885421,4.6460176726,0.821035029<br/> H,1.8908401913,4.6595415481,-0.9563248209<br/> C,-2.4260451951,1.3828213547,-0.0128506709<br/> H,-2.5778354601,0.7821221928,0.8864380808<br/> H,-3.1559128773,2.1963770258,-0.0350399226<br/> H,-2.5692436962,0.740959548,-0.884463264</p>         |
|  | <p>5:OCS (TB-A) NIMAG= 0<br/> C,-3.000236803,-0.6571177975,0.0055854897<br/> S,-2.7816517404,-2.2122258843,-0.0054388361<br/> O,-3.2335446304,0.4750214004,0.0141642085<br/> C,0.0192448667,0.4540616892,-0.0057266894<br/> C,0.1423557423,1.882700292,-0.0050766389<br/> C,1.4706637324,2.2364277347,-0.0188404125<br/> N,1.3035654067,0.052627671,-0.0108438531<br/> N,2.2184876226,1.1073625721,-0.0397802595<br/> C,3.648784303,0.9576792808,0.101050141<br/> H,4.1046930008,1.9431707547,-0.0060510792<br/> H,3.9225638437,0.5530060279,1.0826144659<br/> H,4.0568046268,0.3049703038,-0.6765434927<br/> C,1.786974905,-1.3119924695,-0.0547076679<br/> H,0.9003445614,-1.9418907341,-0.0201877467<br/> H,2.3395298474,-1.5153528464,-0.9789359865<br/> H,2.4297117454,-1.5420061571,0.8021737584<br/> H,-0.685408718,2.5751737041,-0.0040254994<br/> H,1.9679626877,3.1958434582,-0.0194299015</p>         |

|  |                                                                                                                                                                                                                                                                                                                                                                                                                                                                                                                                                                                                                                                                                                                                                                                                                                                                                                                           |
|--|---------------------------------------------------------------------------------------------------------------------------------------------------------------------------------------------------------------------------------------------------------------------------------------------------------------------------------------------------------------------------------------------------------------------------------------------------------------------------------------------------------------------------------------------------------------------------------------------------------------------------------------------------------------------------------------------------------------------------------------------------------------------------------------------------------------------------------------------------------------------------------------------------------------------------|
|  | <p><b>5:OCS (TB-B) NIMAG= 0</b><br/> C,-2.431926544,-1.6756854657,-0.0006562227<br/> S,-3.6339032023,-0.6716135644,-0.0085214307<br/> O,-1.588774254,-2.4703956377,0.0057303997<br/> C,0.0036468266,0.5277283365,-0.0156049138<br/> C,0.127627628,1.956357585,-0.0046083771<br/> C,1.4562388198,2.3104480584,-0.0049185593<br/> N,1.2888852575,0.1264885418,-0.0145037596<br/> N,2.2034497319,1.1817416764,-0.0246483279<br/> C,3.6352229769,1.0305504889,0.0956126104<br/> H,4.0877911104,2.020469754,0.0199198531<br/> H,3.91909443,0.5920271207,1.0593503027<br/> H,4.0377067474,0.4067241114,-0.7084151633<br/> C,1.7758811439,-1.2377161699,-0.0555646368<br/> H,0.8925446096,-1.8726611228,-0.0368158034<br/> H,2.3444253072,-1.4347345547,-0.9714423329<br/> H,2.4069017579,-1.4670962496,0.8101999292<br/> H,-0.6982174525,2.6512312515,-0.0043071296<br/> H,1.9532491057,3.2699348402,0.004193562</p>            |
|  | <p><b>5:OCS (YB) NIMAG= 0</b><br/> C,1.5261643292,3.3577212376,0.0204151614<br/> S,0.9974359187,1.8762707631,0.0129356337<br/> O,1.9160545662,4.4518302422,0.0259518072<br/> C,-0.0235816194,-1.1774560765,-0.0029808892<br/> C,0.8170747461,-2.3368982122,-0.0173002108<br/> C,0.042267512,-3.4732481544,-0.0275781455<br/> N,-1.2590497864,-1.7119293791,-0.0020418345<br/> N,-1.260334235,-3.106836245,-0.0254602657<br/> C,-2.4456650206,-3.9310258717,0.0332030407<br/> H,-2.133853408,-4.9750522085,-0.0210958485<br/> H,-2.9961712106,-3.7824378805,0.9687898046<br/> H,-3.1158758011,-3.7277907132,-0.8081638405<br/> C,-2.5192418254,-0.9975667517,-0.0079708098<br/> H,-2.2637344719,0.0596789875,0.017621493<br/> H,-3.098202333,-1.20728798,-0.9141403831<br/> H,-3.1278200906,-1.2440154035,0.8689048692<br/> H,1.8961776474,-2.3220663684,-0.0233151801<br/> H,0.2935250824,-4.5240779855,-0.0377744024</p> |
|  | <p><b>6:OCS (TB-A) NIMAG= 0</b><br/> C,-3.0970661806,-1.3155825948,-0.029358589<br/> S,-4.1100728096,-0.1203836643,-0.0657267412<br/> O,-2.3941816456,-2.2351993663,-0.0031154462<br/> C,-0.2013893548,0.1514197557,0.0092433033<br/> N,1.9834859625,0.9397331027,0.0148460128<br/> N,1.9919088002,-0.3760637674,0.0347818941<br/> N,0.6723853143,1.2131058294,-0.0004192863<br/> C,0.7299216558,-0.8915220785,0.0310000846<br/> H,0.5833688359,-1.959985132,0.0464924078<br/> C,3.2661287047,-1.0752489265,0.0058418211<br/> H,4.0256716807,-0.4385543008,0.458500979<br/> H,3.1730335491,-2.0023350971,0.5734793794<br/> H,3.5513968361,-1.3076724421,-1.0237496913<br/> C,0.2926322495,2.6177447966,-0.0011520698<br/> H,0.5654623655,3.0871374044,0.947876061<br/> H,0.7953336856,3.1434278642,-0.8161888235<br/> H,-0.7865546491,2.6521916166,-0.1349682955</p>                                                      |

|                                                                                     |                                                                                                                                                                                                                                                                                                                                                                                                                                                                                                                                                                                                                                                                                                                                                                                                                                                                                 |
|-------------------------------------------------------------------------------------|---------------------------------------------------------------------------------------------------------------------------------------------------------------------------------------------------------------------------------------------------------------------------------------------------------------------------------------------------------------------------------------------------------------------------------------------------------------------------------------------------------------------------------------------------------------------------------------------------------------------------------------------------------------------------------------------------------------------------------------------------------------------------------------------------------------------------------------------------------------------------------|
| 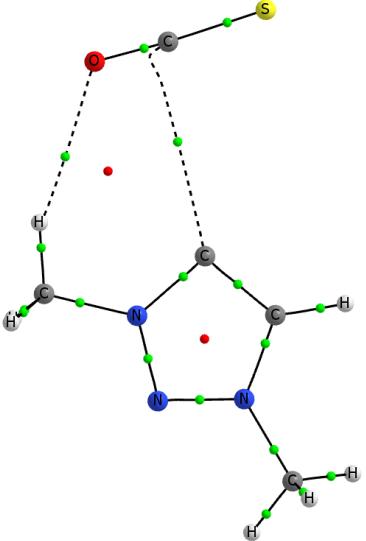   | <p><b>6:OCS (TB-B) NIMAG= 0</b><br/> C,-3.3974286767,-0.3916077063,-0.0776796754<br/> S,-3.5751621282,-1.9481461646,-0.072101489<br/> O,-3.326960015,0.7643174768,-0.0833277641<br/> C,-0.0843459386,-0.2827321568,-0.0021052383<br/> N,1.933280793,0.8678661155,0.0389988827<br/> N,2.1675298458,-0.4268774651,0.044840086<br/> N,0.5958439155,0.9139207743,0.0108355039<br/> C,1.0119702866,-1.1504615557,0.0195677005<br/> H,1.0551699281,-2.228342101,0.023107105<br/> C,3.5430077666,-0.8968313878,0.0281615221<br/> H,4.1802317503,-0.1260697076,0.4603563403<br/> H,3.6132544524,-1.8108303079,0.6201637281<br/> H,3.8638517652,-1.1033964801,-0.99648769<br/> C,-0.0174050573,2.2343908904,0.0086765814<br/> H,0.2536722348,2.7785112832,0.9170045484<br/> H,0.3188995912,2.8047986631,-0.8607258478<br/> H,-1.0939455133,2.0837028295,-0.0319012937</p>                |
|   | <p><b>6:OCS (YB) NIMAG= 0</b><br/> C,-0.1590686525,3.6673477215,0.094853817<br/> S,-0.0911305088,2.0977770887,0.0281726248<br/> O,-0.2087891953,4.8264884097,0.1443084525<br/> C,-0.0214198974,-1.1372704523,-0.0721486795<br/> N,0.6361774031,-3.3614958205,-0.0096451854<br/> N,-0.6771975932,-3.2925555581,0.0128604553<br/> N,0.9874655428,-2.0708487147,-0.0608754575<br/> C,-1.1172481603,-2.0018583575,-0.0228391097<br/> H,-2.1762074573,-1.7962109393,-0.0126606765<br/> C,-1.4512957934,-4.5233289152,0.0118342775<br/> H,-0.8449024603,-5.3170464623,0.4467760121<br/> H,-2.3523165085,-4.3753600237,0.6092309223<br/> H,-1.7332862527,-4.7962821409,-1.0086087595<br/> C,2.4123793084,-1.7746743934,-0.0520066018<br/> H,2.7906615038,-1.7553665285,0.973972585<br/> H,2.9484643215,-2.5368295171,-0.6197066281<br/> H,2.5457494003,-0.7933653964,-0.5035180487</p> |
|  | <p><b>7:OCS (TB) NIMAG= 0</b><br/> C,-3.4909198288,-0.8194712164,0.<br/> S,-4.3733944546,0.4771150369,0.<br/> O,-2.9212230915,-1.8281025826,0.<br/> C,-0.5863226338,0.3612583886,0.<br/> C,0.3797185225,1.3696274816,0.<br/> C,0.2422898721,-0.7636799608,0.<br/> N,1.6656500238,0.8953376577,0.<br/> N,1.5772630203,-0.4597472287,0.<br/> C,2.7379160637,-1.3220603461,0.<br/> H,2.3717103754,-2.3494192275,0.<br/> H,3.3556417831,-1.1739296677,-0.8922641956<br/> H,3.3556417831,-1.1739296677,0.8922641956<br/> C,2.9276589748,1.6007864444,0.<br/> H,2.6969670002,2.666838769,0.<br/> H,3.52134445,1.3745259303,0.8922578136<br/> H,3.52134445,1.3745259303,-0.8922578136<br/> H,-0.0074347413,-1.8190807691,0.<br/> H,0.2754271814,2.4494526422,0.</p>                                                                                                                    |

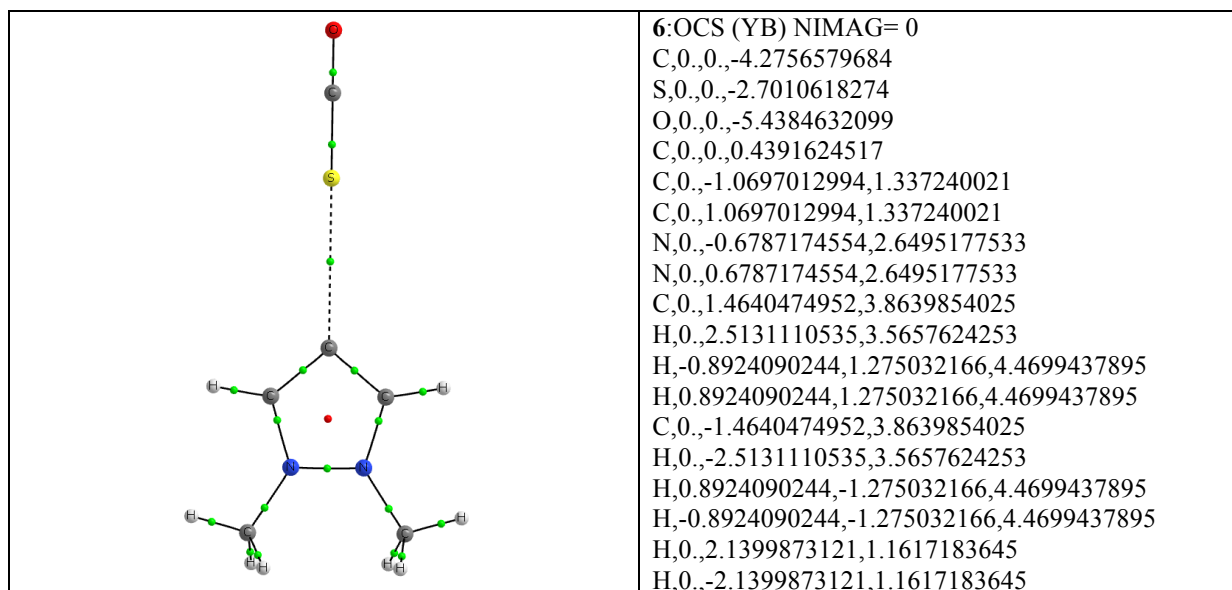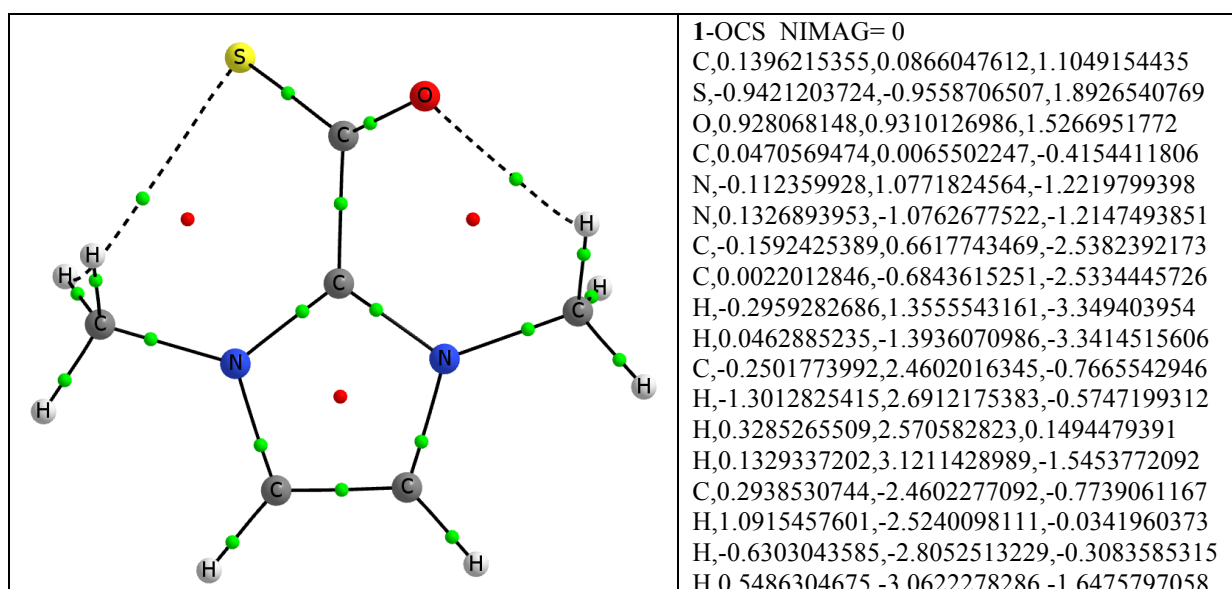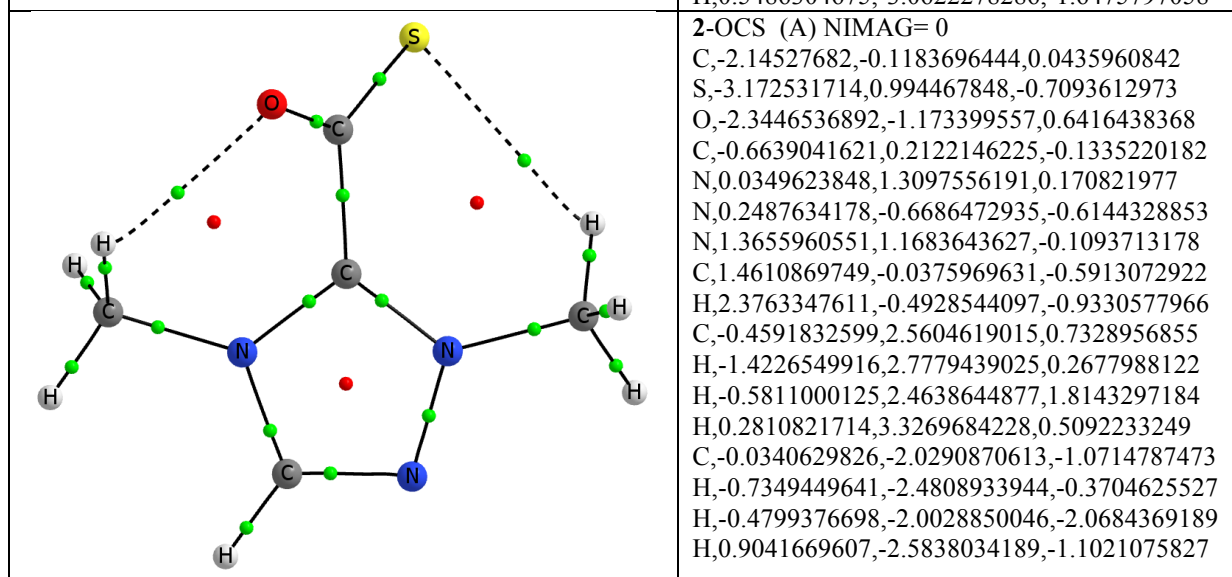



|                                                                                     |                                                                                                                                                                                                                                                                                                                                                                                                                                                                                                                                                                                                                                                                                                                                                                                                                                                                                                                  |
|-------------------------------------------------------------------------------------|------------------------------------------------------------------------------------------------------------------------------------------------------------------------------------------------------------------------------------------------------------------------------------------------------------------------------------------------------------------------------------------------------------------------------------------------------------------------------------------------------------------------------------------------------------------------------------------------------------------------------------------------------------------------------------------------------------------------------------------------------------------------------------------------------------------------------------------------------------------------------------------------------------------|
| 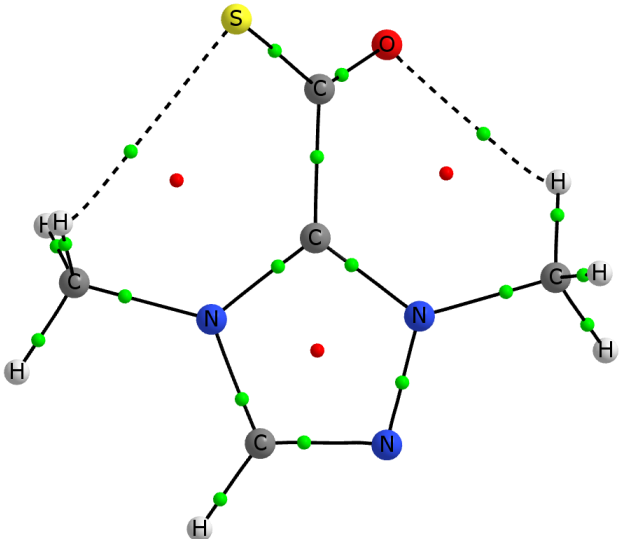   | <p><b>2-OCS (B) NIMAG= 0</b></p> <p>C,-2.1340317765,0.1557352103,-0.1571675731<br/> S,-2.6908044487,-1.2547540459,0.5988767561<br/> O,-2.7073911579,1.1120108265,-0.6696589827<br/> C,-0.6121171217,0.2803797255,-0.0972642796<br/> N,0.0542172252,1.3529083873,0.3439789388<br/> N,0.346855685,-0.6022828197,-0.4726789492<br/> N,1.4082356582,1.1807232668,0.2967498207<br/> C,1.5515387083,-0.0103868267,-0.2095041031<br/> H,2.4990221097,-0.4832361338,-0.4105188589<br/> C,-0.5096559909,2.5939996481,0.8599531557<br/> H,-1.5038883716,2.7066629312,0.429727844<br/> H,-0.5635354363,2.5532942792,1.950568507<br/> H,0.1457750698,3.40934091,0.5547844536<br/> C,0.1455274488,-1.9419477506,-1.0204002197<br/> H,-0.406139512,-2.5400374065,-0.2937990206<br/> H,-0.438353963,-1.8837473638,-1.940028035<br/> H,1.1268984536,-2.368567168,-1.2321324741</p>                                               |
|   | <p><b>3-OCS NIMAG= 0</b></p> <p>C,-0.1162941925,-0.0941257082,1.6258397806<br/> S,1.0027403589,0.9184714431,2.3852984194<br/> O,-0.9206621219,-0.9275511662,2.028862415<br/> C,-0.0286637311,0.0021868437,0.1013580945<br/> N,-0.0800100518,1.0567146703,-0.7243631993<br/> N,0.0857202507,-1.0434544874,-0.7304961033<br/> N,0.0213914922,0.6473146937,-2.0162052838<br/> N,0.1284959621,-0.6218192539,-2.0200152328<br/> C,-0.1810064809,2.4750030564,-0.4036312517<br/> H,-1.1300182039,2.6727002441,0.0972956943<br/> H,0.6390598858,2.73353931,0.2684034899<br/> H,-0.127417291,3.0160175702,-1.3472083514<br/> C,0.1641865461,-2.4600498213,-0.3908537044<br/> H,1.2002407181,-2.7325987335,-0.1775295956<br/> H,-0.4559703258,-2.6177057872,0.491251513<br/> H,-0.2017928149,-3.0246428737,-1.2473145931</p>                                                                                              |
|  | <p><b>4-OCS (A) NIMAG= 0</b></p> <p>C,1.5611044191,1.8891751238,0.0622055927<br/> S,2.9760602177,1.0198554905,0.4550986283<br/> O,1.4085281448,3.0724995013,-0.2310484777<br/> C,0.2365611851,1.1302617966,0.0554767895<br/> C,-1.3910844103,-0.379141374,0.1816285954<br/> N,-1.9531824833,0.7831114543,-0.1669617655<br/> N,-0.0753160413,-0.2045654902,0.323349819<br/> C,-0.9579522889,1.7293472302,-0.2495411157<br/> H,-1.1352848394,2.7565302495,-0.5133085172<br/> H,-1.9186264958,-1.307032612,0.3250950157<br/> C,-3.3713215234,1.0033873469,-0.4171653264<br/> H,-3.9143210542,0.0705808212,-0.2615105179<br/> H,-3.755128303,1.7616915987,0.2686994341<br/> H,-3.5193528805,1.3387205408,-1.4460232987<br/> C,0.8234563475,-1.3001817759,0.7040834413<br/> H,1.3457808975,-1.0391037121,1.6225960992<br/> H,0.2119420674,-2.19747983,0.8310845494<br/> H,1.577836601,-1.4365098296,-0.0685647656</p> |

|                                                                                     |                                                                                                                                                                                                                                                                                                                                                                                                                                                                                                                                                                                                                                                                                                                                                                                                                                                                                                                             |
|-------------------------------------------------------------------------------------|-----------------------------------------------------------------------------------------------------------------------------------------------------------------------------------------------------------------------------------------------------------------------------------------------------------------------------------------------------------------------------------------------------------------------------------------------------------------------------------------------------------------------------------------------------------------------------------------------------------------------------------------------------------------------------------------------------------------------------------------------------------------------------------------------------------------------------------------------------------------------------------------------------------------------------|
| 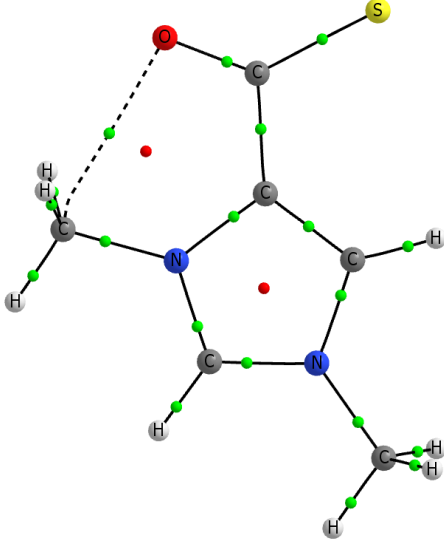   | <p><b>4-OCS (B) NIMAG= 0</b></p> <p>C,1.8232860855,1.6788352639,0.0398480391<br/> S,1.3722730001,3.3196468141,0.0901716736<br/> O,2.933519693,1.1394353569,0.0590114928<br/> C,0.647951669,0.7227437719,-0.0428666692<br/> C,-0.4206622507,-1.2265690791,-0.1614275776<br/> N,-1.3451131447,-0.2589818334,-0.1568948119<br/> N,0.7881532472,-0.6661784867,-0.0936605694<br/> C,-0.7001631421,0.9561233743,-0.083902171<br/> H,-1.2121179661,1.9020772645,-0.0647921953<br/> H,-0.6230699704,-2.2833294181,-0.2115315297<br/> C,-2.7871047479,-0.4585059347,-0.2211236528<br/> H,-3.0015350729,-1.5271123712,-0.2565159757<br/> H,-3.2605670646,-0.0253566799,0.6624871146<br/> H,-3.1887588698,0.0195831287,-1.1171506604<br/> C,2.0386508785,-1.4338777809,-0.077333917<br/> H,2.5920169632,-1.2089110957,0.8316859205<br/> H,1.7799004436,-2.4941273757,-0.1297821816<br/> H,2.6581781988,-1.1383089188,-0.9211063092</p> |
|   | <p><b>5-OCS (A) NIMAG= 0</b></p> <p>C,-2.1480184793,-0.4411933559,-0.1001437157<br/> S,-2.6084742938,-2.0289312094,0.3270816305<br/> O,-2.8267836611,0.522203377,-0.437281744<br/> C,-0.6626064757,-0.071021654,0.0225290879<br/> C,-0.2217147598,1.2255033138,0.335673746<br/> C,1.1523474864,1.19383789,0.3294756709<br/> N,0.4392024079,-0.8294528003,-0.1688443214<br/> N,1.553871087,-0.0563865808,0.0145009325<br/> C,2.9022419985,-0.5665531059,-0.1385735129<br/> H,3.5836356229,0.2715946772,0.0072405542<br/> H,3.1208374439,-1.3361244721,0.6066142444<br/> H,3.0532251758,-0.9767379504,-1.1403679057<br/> C,0.5500735298,-2.228436995,-0.5592987333<br/> H,-0.4658063608,-2.6345352649,-0.4602631025<br/> H,0.9139486737,-2.3090317157,-1.5872656895<br/> H,1.221953321,-2.753059203,0.1234329778<br/> H,-0.8772017388,2.0581900128,0.5198256081<br/> H,1.8869196421,1.9603104167,0.5198900827</p>             |
|  | <p><b>5-OCS (B) NIMAG= 0</b></p> <p>C,-1.8124127793,-1.03149362,-0.0265039372<br/> S,-3.2961860058,-0.368885723,-0.5197701037<br/> O,-1.513771931,-2.1924656001,0.2707516663<br/> C,-0.6860435532,0.0023738474,0.0243030684<br/> C,-0.7603143379,1.4036032754,0.074211475<br/> C,0.5315432344,1.8731770696,0.0973273409<br/> N,0.6293230543,-0.323284535,0.027750727<br/> N,1.3789339819,0.819713471,0.0641337601<br/> C,2.8273501994,0.8172613631,0.0133017478<br/> H,3.1531244119,1.8572790451,0.0243226927<br/> H,3.2525267591,0.3041558648,0.8799087923<br/> H,3.1879006345,0.3426891461,-0.9033622299<br/> C,1.2553304199,-1.6400121422,-0.0124182805<br/> H,0.4239954118,-2.3446322555,0.0768724683<br/> H,1.7932805897,-1.7776466502,-0.9544977084<br/> H,1.9421088616,-1.7523939319,0.8302982453<br/> H,-1.6824742906,1.9573243976,0.0735288569<br/> H,0.9249106793,2.8767556379,0.1310283787</p>                   |

|                                                                                     |                                                                                                                                                                                                                                                                                                                                                                                                                                                                                                                                                                                                                                                                                                                                                                                                                                                                                                                 |
|-------------------------------------------------------------------------------------|-----------------------------------------------------------------------------------------------------------------------------------------------------------------------------------------------------------------------------------------------------------------------------------------------------------------------------------------------------------------------------------------------------------------------------------------------------------------------------------------------------------------------------------------------------------------------------------------------------------------------------------------------------------------------------------------------------------------------------------------------------------------------------------------------------------------------------------------------------------------------------------------------------------------|
| 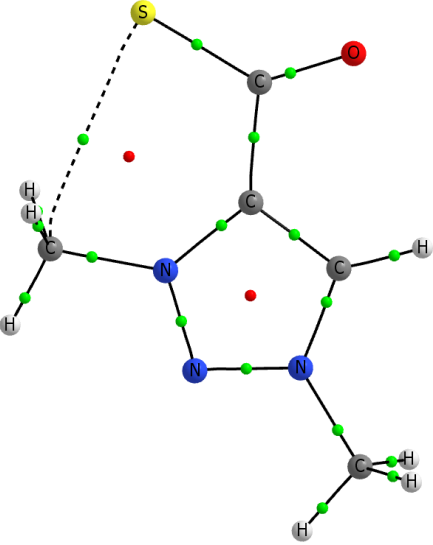   | <p><b>6-OCS (A) NIMAG= 0</b><br/> C,-2.3954185867,-0.6768483632,0.0798189223<br/> S,-3.42133505,0.6798428779,0.1072396162<br/> O,-2.6391330926,-1.8813266563,0.0938445476<br/> C,-0.8896093016,-0.4164011885,0.0290245359<br/> N,1.1615171894,0.4933809335,-0.0441953458<br/> N,1.2603237704,-0.822614289,-0.0382685162<br/> N,-0.1396033065,0.7292527346,-0.0033902767<br/> C,0.053436554,-1.4253042621,0.0052398574<br/> H,-0.0983294839,-2.4899223338,0.0174675004<br/> C,2.5825214667,-1.4360024783,-0.0759751612<br/> H,3.3190695786,-0.6352754673,-0.1149406359<br/> H,2.7313136415,-2.0391078057,0.8216395893<br/> H,2.6669179928,-2.0669141753,-0.9627071219<br/> C,-0.5609594875,2.1330440753,0.000226582<br/> H,-1.1468829786,2.3253559496,0.8975140225<br/> H,0.3505636302,2.7296692897,-0.0353849612<br/> H,-1.2067321562,2.3118881389,-0.8579057847</p>                                            |
|   | <p><b>6-OCS (B) NIMAG= 0</b><br/> C,-2.4374152448,-0.5038010462,-0.085717102<br/> S,-2.8458013457,-2.1454601574,0.0888964988<br/> O,-3.1431908168,0.4947511681,-0.2357695937<br/> C,-0.9296591355,-0.2671017675,-0.0435949767<br/> N,1.020445707,0.8535779845,0.0256335087<br/> N,1.2496707493,-0.447515722,-0.0088873983<br/> N,-0.299172731,0.9484770311,-0.0018069511<br/> C,0.1121463844,-1.1732995725,-0.0498647646<br/> H,0.0719852928,-2.2479635625,-0.0753116597<br/> C,2.627077228,-0.9258391879,-0.0085023281<br/> H,3.2781908284,-0.0620508675,0.1143571233<br/> H,2.7683100635,-1.6237704668,0.8184079645<br/> H,2.8428402398,-1.4261634894,-0.9545842626<br/> C,-0.9020146988,2.2845320233,0.0438132423<br/> H,-0.7871845396,2.6915610545,1.0505860324<br/> H,-0.381603054,2.919537818,-0.6734755678<br/> H,-1.955438807,2.1487356904,-0.2007411255</p>                                            |
|  | <p><b>7-OCS NIMAG= 0</b><br/> C,-0.0000668258,-0.0799709461,2.337472005<br/> S,0.0011860294,1.4461542587,3.1089047702<br/> O,-0.0009953556,-1.2259629366,2.7842243556<br/> C,-0.000009685,-0.0101977652,0.8204040628<br/> C,0.0008950359,1.0901740745,-0.0255085105<br/> C,-0.0009164111,-1.1114107659,-0.0260623621<br/> N,0.0005500796,0.6717459974,-1.3070726928<br/> N,-0.0005656666,-0.6938356128,-1.3105625082<br/> C,-0.001260667,-1.477529952,-2.531770976<br/> H,-0.002057072,-2.5267984858,-2.2385069369<br/> H,-0.8954001441,-1.2776518668,-3.1287992754<br/> H,0.8931086587,-1.2790456077,-3.128918389<br/> C,0.0012475549,1.4613192045,-2.5249948941<br/> H,0.0020442934,2.5089180897,-2.2261428909<br/> H,0.8955336191,1.2628816599,-3.121871084<br/> H,-0.8932690123,1.2642778107,-3.1219868649<br/> H,0.0017586033,2.1352696916,0.2437110095<br/> H,-0.0017830347,-2.1583368483,0.231663971</p> |

|  |                                                                                                                                                                                                                                                                                                                                                                                                                                                                                                                                                                                                                                                                                                                                                                                                                                                                                                             |
|--|-------------------------------------------------------------------------------------------------------------------------------------------------------------------------------------------------------------------------------------------------------------------------------------------------------------------------------------------------------------------------------------------------------------------------------------------------------------------------------------------------------------------------------------------------------------------------------------------------------------------------------------------------------------------------------------------------------------------------------------------------------------------------------------------------------------------------------------------------------------------------------------------------------------|
|  | <p>1/OCS NIMAG= 1<br/> C,0.0190131623,-0.1430002186,2.1250656315<br/> S,-0.9503101949,1.0455887239,2.640001199<br/> O,0.6962742535,-1.081204915,2.3248828991<br/> C,0.0926318553,0.0105510958,-0.1063255893<br/> N,0.0675332731,1.0792167994,-0.9411892699<br/> N,-0.0297526952,-1.0543275546,-0.9393253645<br/> C,-0.0659794799,0.692191709,-2.2661416217<br/> C,-0.1311061677,-0.6597050993,-2.2651386855<br/> H,-0.0947591702,1.4013783447,-3.0764119583<br/> H,-0.2414261298,-1.3636627375,-3.0729456003<br/> C,0.2202293777,2.462023501,-0.5122727363<br/> H,0.1352980617,2.4961150718,0.5725319711<br/> H,1.1943754649,2.8534773961,-0.8207618646<br/> H,-0.5678876256,3.0780262029,-0.9537120637<br/> C,-0.0797051566,-2.4424033761,-0.4999073699<br/> H,0.2110878857,-2.4833197941,0.5475378246<br/> H,-1.089761712,-2.8467801025,-0.6167024014<br/> H,0.6142449978,-3.0441650471,-1.0931159126</p> |
|  | <p>2/OCS (A) NIMAG= 1<br/> C,-2.0442223702,-0.1119092768,-0.0070524152<br/> S,-2.6044436741,1.1145818458,-0.9103315268<br/> O,-2.2557381738,-1.0780693755,0.6334687359<br/> C,0.0972539005,0.0246227405,0.0392137154<br/> N,0.9518223665,1.0547171025,0.0418090923<br/> N,0.9315421062,-1.0540696084,0.0010758731<br/> N,2.2792046593,0.6923002197,0.0096299762<br/> C,2.2276777322,-0.6063313502,-0.020038666<br/> H,3.0889616779,-1.2545726404,-0.0551712259<br/> C,0.6216991617,2.4683087558,0.1109822521<br/> H,-0.454843219,2.5686459444,-0.019782747<br/> H,0.9300088549,2.8743166492,1.0775317211<br/> H,1.1483667272,2.9976352717,-0.6851792121<br/> C,0.5139750427,-2.4515641866,-0.047756232<br/> H,-0.5101100361,-2.5155373897,0.3141657937<br/> H,0.5643816188,-2.8307751686,-1.0721416413<br/> H,1.1691308746,-3.049527635,0.5895765065</p>                                                    |
|  | <p>2/OCS (B) NIMAG= 1<br/> C,-2.0258034156,0.0934370429,0.3381037823<br/> S,-2.3739018983,-1.1274156915,1.351479651<br/> O,-2.3707030567,1.0443295096,-0.2621986002<br/> C,0.0855557689,-0.0129726369,-0.0669695947<br/> N,0.9071231813,1.0445970302,-0.0402452788<br/> N,0.9551269558,-1.0616018048,-0.1261013729<br/> N,2.2463094472,0.7277558136,-0.0758127551<br/> C,2.2355231525,-0.5711536313,-0.1331187567<br/> H,3.1166404805,-1.191364267,-0.1798692837<br/> C,0.5274998055,2.4460155098,0.0346316932<br/> H,-0.5529814335,2.5094041199,-0.0776166913<br/> H,0.8347230511,2.8639350174,0.9963993081<br/> H,1.0241314815,2.9946984382,-0.7679959555<br/> C,0.5818996369,-2.4670674212,-0.2317737992<br/> H,0.4913745391,-2.7622143467,-1.2806255933<br/> H,1.346629983,-3.0796542492,0.2501070235<br/> H,-0.3744804324,-2.6079565356,0.271606223</p>                                                |

|  |                                                                                                                                                                                                                                                                                                                                                                                                                                                                                                                                                                                                                                                                                                                                                                                                                                                                                                                      |
|--|----------------------------------------------------------------------------------------------------------------------------------------------------------------------------------------------------------------------------------------------------------------------------------------------------------------------------------------------------------------------------------------------------------------------------------------------------------------------------------------------------------------------------------------------------------------------------------------------------------------------------------------------------------------------------------------------------------------------------------------------------------------------------------------------------------------------------------------------------------------------------------------------------------------------|
|  | <p><b>3/OCS NIMAG= 1</b><br/> C,-0.0561318076,-0.1263773881,2.0607694738<br/> S,0.8464104678,1.1004517425,2.6427190179<br/> O,-0.6856002973,-1.0977530444,2.2959071771<br/> C,-0.0782147406,0.0181838627,0.0144343377<br/> N,-0.0115763043,1.0483506972,-0.8424972836<br/> N,0.028050248,-1.0297461208,-0.8171754647<br/> N,0.1280328866,0.629762756,-2.1370657216<br/> N,0.1579768433,-0.6397871297,-2.1217487279<br/> C,-0.1069416613,2.472265044,-0.5539324987<br/> H,-1.1411203594,2.8077633148,-0.6610035841<br/> H,0.234755652,2.6292387008,0.4692954799<br/> H,0.5265160573,3.0073140552,-1.2613723462<br/> C,0.0391898101,-2.4484713706,-0.4855851805<br/> H,1.055657025,-2.8406124345,-0.563778242<br/> H,-0.3278574892,-2.5536306165,0.5335204872<br/> H,-0.6091463305,-2.9769520687,-1.1854284385</p>                                                                                                     |
|  | <p><b>4/OCS (A) NIMAG= 1</b><br/> C,1.7554648497,2.0133227812,-0.0996249407<br/> S,3.2043836252,1.3583449792,-0.3103085413<br/> O,0.958877764,2.8576611902,0.0139689597<br/> C,0.1611874024,0.2065237182,0.0804243403<br/> C,-1.0809730664,-1.7007487105,0.0162982253<br/> N,-1.93526826,-0.6739584636,-0.0049936227<br/> N,0.1587885266,-1.1946713416,0.0639850181<br/> C,-1.1836585545,0.4973049144,0.0326949787<br/> H,-1.6824788299,1.45332638,0.016855228<br/> H,-1.3595086766,-2.7418824431,-0.0042222993<br/> C,-3.3834919064,-0.7759542311,-0.0771796057<br/> H,-3.6805958072,-1.8255804721,-0.0594412258<br/> H,-3.8369104718,-0.2645947179,0.7757517363<br/> H,-3.7490086098,-0.3183019717,-1.0002801849<br/> C,1.371208437,-1.9989868723,0.1409008217<br/> H,1.6793958466,-2.1265496757,1.1824042469<br/> H,1.2012805393,-2.9802966713,-0.309016388<br/> H,2.1619401919,-1.4729533922,-0.3932167467</p>   |
|  | <p><b>4/OCS (B) NIMAG= 1</b><br/> C,2.5704164696,0.1843698302,0.0320030905<br/> S,2.9604672672,-1.3658644382,0.0667883296<br/> O,2.7235577385,1.3422516754,0.0094944212<br/> C,0.1273241565,0.0961711097,0.0151556754<br/> C,-2.0757955647,0.6785038234,-0.0120635279<br/> N,-2.0196590455,-0.6560185226,0.0167361787<br/> N,-0.8153678528,1.134988412,-0.0132787903<br/> C,-0.6777221161,-1.0214903022,0.0335381238<br/> H,-0.4070668009,-2.0650648601,0.0576323835<br/> H,-2.9825914899,1.261212975,-0.0304667758<br/> C,-3.1638188079,-1.5529100032,0.0281719761<br/> H,-4.0873891303,-0.9724772409,0.0095562188<br/> H,-3.1369428743,-2.2067360049,-0.8473792018<br/> H,-3.1489345181,-2.1687856981,0.9310987496<br/> C,-0.4514478647,2.5471341388,-0.0413093806<br/> H,-0.8321154418,3.0277612277,-0.947298845<br/> H,-0.8500479568,3.0676999292,0.8343785998<br/> H,0.635974632,2.5970213989,-0.0316151756</p> |

|  |                                                                                                                                                                                                                                                                                                                                                                                                                                                                                                                                                                                                                                                                                                                                                                                                                                                                                                                   |
|--|-------------------------------------------------------------------------------------------------------------------------------------------------------------------------------------------------------------------------------------------------------------------------------------------------------------------------------------------------------------------------------------------------------------------------------------------------------------------------------------------------------------------------------------------------------------------------------------------------------------------------------------------------------------------------------------------------------------------------------------------------------------------------------------------------------------------------------------------------------------------------------------------------------------------|
|  | <p><b>5/OCS (A) NIMAG= 1</b></p> <p>C,-2.2627774468,-0.5028022618,-0.0390119105<br/> S,-2.0727582603,-2.0986264173,-0.0382448552<br/> O,-2.8416658855,0.5095429807,-0.0465520994<br/> C,-0.0872673074,0.4931397804,-0.0052164982<br/> C,0.0445251198,1.908370751,-0.0021357447<br/> C,1.3832513015,2.2294301959,0.0149001942<br/> N,1.1783470198,0.0479994174,0.0100820097<br/> N,2.103157245,1.0841889119,0.0226758368<br/> C,3.5372481349,0.8982814398,0.0402753214<br/> H,4.0027790408,1.8844971023,0.0479373304<br/> H,3.8586461502,0.3553169913,0.934707441<br/> H,3.8810353717,0.3585942,-0.8478048961<br/> C,1.621564086,-1.3331569182,0.0138776675<br/> H,0.715975328,-1.939477386,0.0011252116<br/> H,2.2242399908,-1.5598841236,-0.8714640834<br/> H,2.2008594709,-1.5625195146,0.9140342946<br/> H,-0.7771216355,2.6071058953,-0.0115953453<br/> H,1.9008072762,3.1774579554,0.0224101256</p>          |
|  | <p><b>5/OCS (B) NIMAG= 1</b></p> <p>C,-1.9321857551,-1.1327668087,-0.0484778848<br/> S,-3.1691188718,-0.1173781619,-0.045909063<br/> O,-1.3866562465,-2.1687046785,-0.0585215684<br/> C,-0.0432429557,0.3414641433,-0.0064682906<br/> C,-0.0235696346,1.7620425332,0.0129125941<br/> C,1.2856233941,2.1876222909,0.0335149825<br/> N,1.2549364141,-0.0021638957,0.0040285986<br/> N,2.0949184638,1.1033106449,0.0276377155<br/> C,3.5391760407,1.0317282234,0.0493385743<br/> H,3.9252014196,2.0516651264,0.0626629474<br/> H,3.9001593392,0.5117490286,0.9424452146<br/> H,3.927086875,0.5250702202,-0.8400170593<br/> C,1.8047376069,-1.3450781356,-0.0099728502<br/> H,0.9504604026,-2.0199808075,-0.027248344<br/> H,2.4205846633,-1.5131309698,-0.8994364471<br/> H,2.4045407738,-1.5384092827,0.8852818925<br/> H,-0.8985084093,2.3929295436,0.0111583487<br/> H,1.7257004797,3.1738299857,0.0520706392</p> |
|  | <p><b>6/OCS (A) NIMAG= 1</b></p> <p>C,-2.8239490853,-0.770427018,-0.0692274519<br/> S,-3.6561301848,0.6114938448,-0.0790334019<br/> O,-2.7191478835,-1.9365095506,-0.0742033995<br/> C,-0.5958118595,-0.2866700954,-0.0216588722<br/> N,1.5329475844,0.5642408162,0.0213986811<br/> N,1.5837957293,-0.7521541719,0.0028655981<br/> N,0.2217854199,0.8081920955,0.0059671433<br/> C,0.3432421769,-1.3099713794,-0.0238933071<br/> H,0.2107555187,-2.3795391798,-0.0407040328<br/> C,2.8823416796,-1.4098234708,-0.0131565248<br/> H,3.6441045374,-0.6621555683,0.2021209842<br/> H,2.9019999531,-2.1918881291,0.7480674063<br/> H,3.065915693,-1.8526622916,-0.9950408655<br/> C,-0.2143756555,2.1996584482,0.0280422397<br/> H,0.1291862061,2.6816706314,0.9458134996<br/> H,0.1952706072,2.7295260913,-0.8343445151<br/> H,-1.3029337071,2.1916445173,-0.0112943716</p>                                          |

|  |                                                                                                                                                                                                                                                                                                                                                                                                                                                                                                                                                                                                                                                                                                                                                                                                                                                                                                                    |
|--|--------------------------------------------------------------------------------------------------------------------------------------------------------------------------------------------------------------------------------------------------------------------------------------------------------------------------------------------------------------------------------------------------------------------------------------------------------------------------------------------------------------------------------------------------------------------------------------------------------------------------------------------------------------------------------------------------------------------------------------------------------------------------------------------------------------------------------------------------------------------------------------------------------------------|
|  | <p>6/OCS (B) NIMAG= 1</p> <p>C,-2.51819954,-0.4867237736,-0.1264933167<br/> S,-2.6674387475,-2.0860363125,-0.2150597375<br/> O,-2.9163737706,0.6144732691,-0.0809419567<br/> C,-0.2374597093,-0.1583173169,-0.0391089607<br/> N,1.8117921668,0.8702439811,0.0707133267<br/> N,1.9742654605,-0.4361436722,0.0085942798<br/> N,0.4847211887,1.0008158882,0.0402566649<br/> C,0.7865819748,-1.0963461758,-0.0576889707<br/> H,0.7456461724,-2.171936517,-0.1147008475<br/> C,3.3225987903,-0.9839122446,0.0397309812<br/> H,4.025876224,-0.1596186551,-0.0676899764<br/> H,3.4960259992,-1.4971974441,0.9885452265<br/> H,3.4471051784,-1.6897440081,-0.7836322135<br/> C,-0.0728155451,2.3477641719,0.0878253369<br/> H,0.23522824,2.8448858737,1.0101174988<br/> H,0.2796465947,2.9263588804,-0.7687461698<br/> H,-1.155735677,2.2436470553,0.0556618348</p>                                                        |
|  | <p>7/OCS NIMAG= 1</p> <p>C,-0.0000009106,0.1437984606,3.1549181612<br/> S,0.0000855014,1.7377486295,3.2731292673<br/> O,-0.0000626425,-0.9799608444,3.4518601702<br/> C,-0.0000115928,-0.1515467739,0.6314626946<br/> C,0.0000507294,0.9618865401,-0.2060847852<br/> C,-0.0000657331,-1.1839816031,-0.3044026939<br/> N,0.0000354435,0.6289090837,-1.5289713158<br/> N,-0.0000382252,-0.7285664031,-1.5937123593<br/> C,-0.0000751122,-1.4560263268,-2.8448506345<br/> H,-0.0001333739,-2.5178726517,-2.5967276918<br/> H,-0.8927988303,-1.2378022098,-3.439996349<br/> H,0.8926748663,-1.2378992869,-3.4399925453<br/> C,0.0000837182,1.4706621282,-2.7063352329<br/> H,0.0001391832,2.5043797044,-2.3595506695<br/> H,0.8927716048,1.3084173556,-3.3189998527<br/> H,-0.8926191954,1.3085144282,-3.3190036563<br/> H,0.0001075706,2.0170361521,0.0416805886<br/> H,-0.0001244902,-2.2594195175,-0.1706014201</p> |

**Table S3.** Dihedral angles (°) for the different NHC-CXY products.

| NHC      | NHC-CO <sub>2</sub> | NHC-OCS | NHC-CS <sub>2</sub> |
|----------|---------------------|---------|---------------------|
| <b>1</b> | 17                  | 54      | 82                  |
| <b>2</b> | 0                   | 53      | 85                  |
| <b>3</b> | 0                   | 53      | 81                  |
| <b>4</b> | 0                   | 0       | 55                  |
| <b>5</b> | 0                   | 19      | 86                  |
| <b>6</b> | 0                   | 10      | 56                  |
| <b>7</b> | 0                   | 0       | 0                   |



**Table S4.** Chemical bonding analysis (EDA-ADF) for non-covalent complexes. For the OCS complexes, the most stable complexes are shown.

|                  | 1:CS2   | 2:CS2   | 3:CS2   | 4:CS2  | 5:CS2   | 6:CS2  | 7:CS2   |
|------------------|---------|---------|---------|--------|---------|--------|---------|
| Electrostatic E. | -16.9   | -14.6   | -12.00  | -23.72 | -20.72  | -19.34 | -27.55  |
| Kinetic E.       | -434.28 | -495.14 | -525.09 | -439.6 | -453.55 | -459.5 | -438.37 |
| Steric+OI E.     | 419.1   | 475.37  | 500.68  | 434.39 | 442.03  | 447.57 | 436.57  |
| XC E.            | 26.91   | 30.22   | 33.46   | 20     | 24.57   | 24.53  | 18.39   |
| Total B. E.      | -5.17   | -4.16   | -2.95   | -8.94  | -7.68   | -6.74  | -10.97  |

|                  | 1:CO2  | 2:CO2  | 3:CO2   | 4:CO2  | 5:CO2  | 6:CO2  | 7:CO2  |
|------------------|--------|--------|---------|--------|--------|--------|--------|
| Electrostatic E. | -44.78 | -39.32 | -33.48  | -59.13 | -54.33 | -45.92 | -66.17 |
| Kinetic E.       | -38.46 | -90.64 | -115.02 | -53.99 | -62.74 | -75.44 | -45.53 |
| Steric+OI E.     | 92.34  | 135.7  | 151.13  | 127.63 | 127.28 | 128.41 | 128.47 |
| XC E.            | -21.91 | -16.63 | -11.36  | -33.79 | -27.89 | -21.51 | -40.44 |
| Total B. E.      | -12.81 | -10.88 | -8.74   | -19.28 | -17.68 | -14.46 | -23.66 |

|                  | 1:OCS   | 2:OCS   | 3:OCS   | 4:OCS   | 5:OCS   | 6:OCS   | 7:OCS   |
|------------------|---------|---------|---------|---------|---------|---------|---------|
| Electrostatic E. | -21.83  | -18.8   | -15.44  | -29.75  | -26.52  | -24.56  | -34.41  |
| Kinetic E.       | -315.06 | -380.62 | -414.62 | -307.29 | -331.13 | -337.62 | -302.66 |
| Steric+OI E.     | 322.65  | 381.39  | 408.53  | 329.94  | 345.17  | 349.94  | 330.84  |
| XC E.            | 6.45    | 11.59   | 16.68   | -4.95   | 1.84    | 2.77    | -8.11   |
| Total B. E.      | -7.79   | -6.43   | -4.85   | -12.05  | -10.65  | -9.48   | -14.34  |

**Figure S1.** Intrinsic Reaction Path (IRC) calculations for several NHC + CXY reactions.

**(A)** IRC coordinates vs. the total electronic energies for reactions **1-6** + OCS. The geometries on the most negative value of the IRC corresponds to the NHC:OCS complex while the most positive one corresponds to the NHC-OCS molecule.

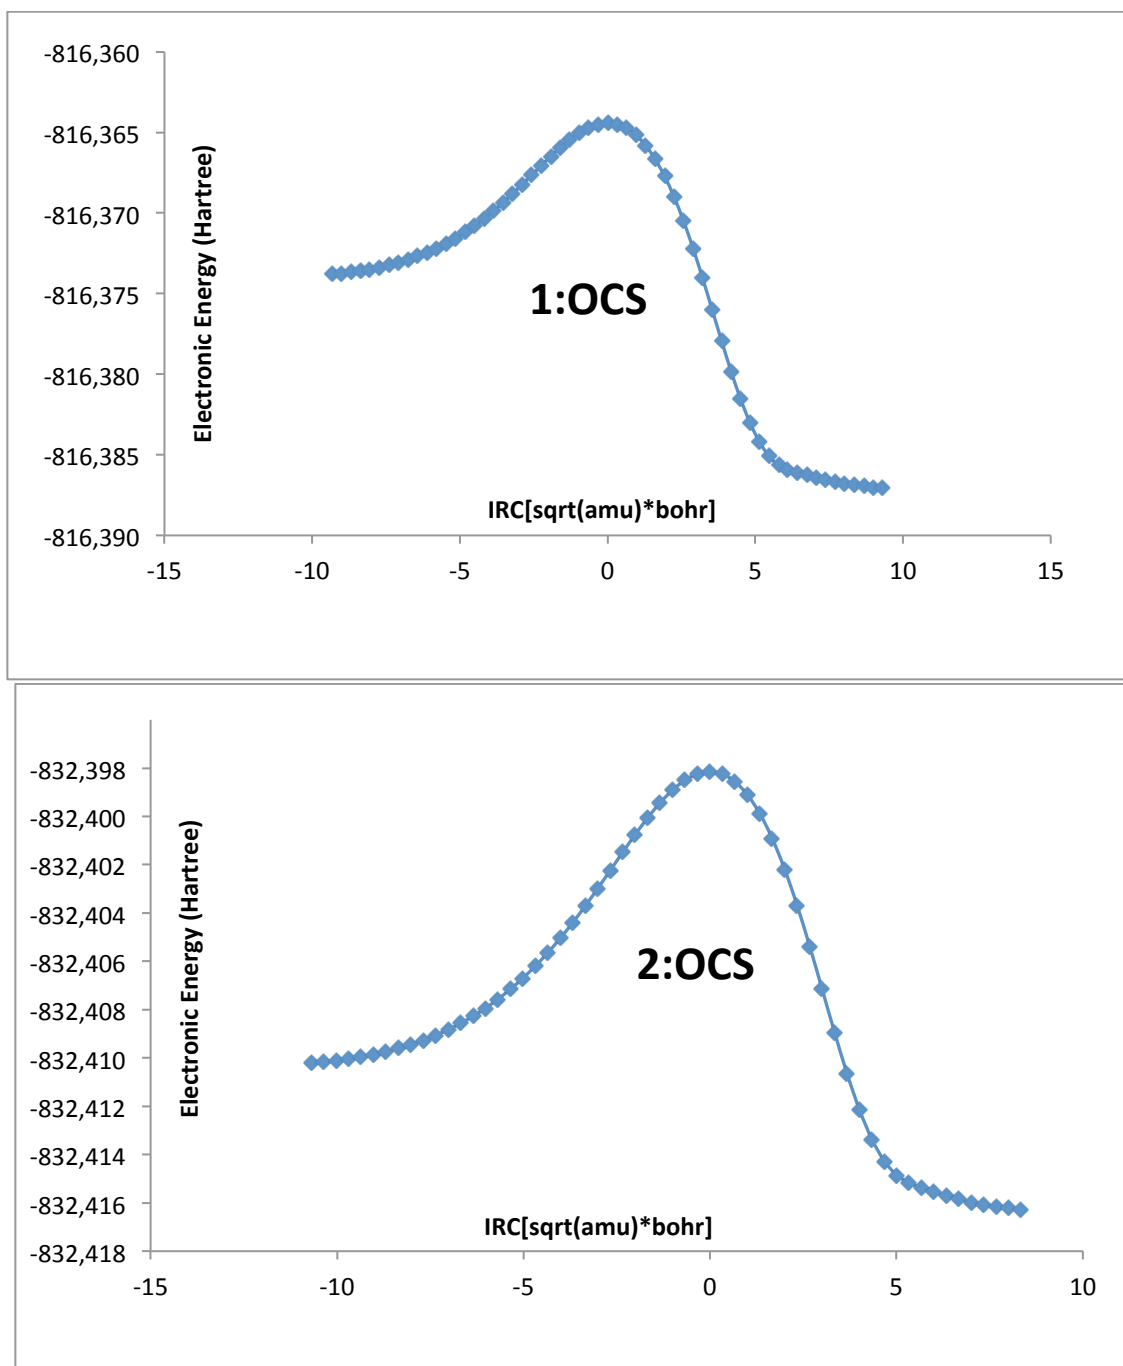

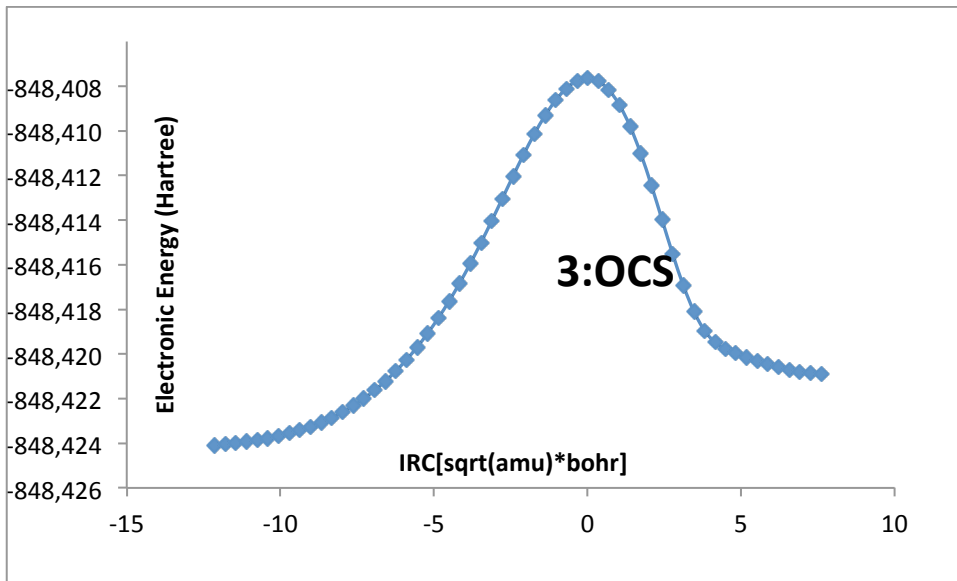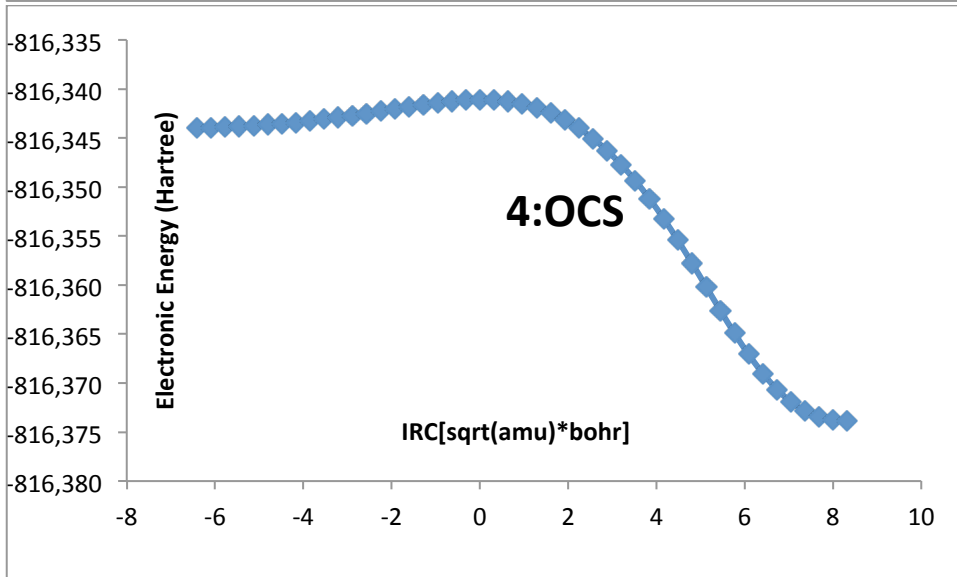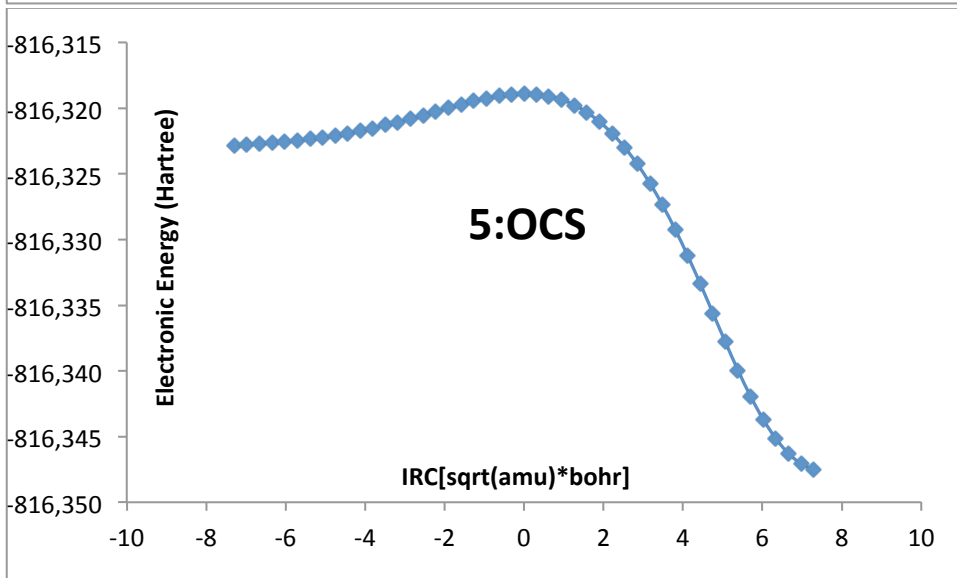

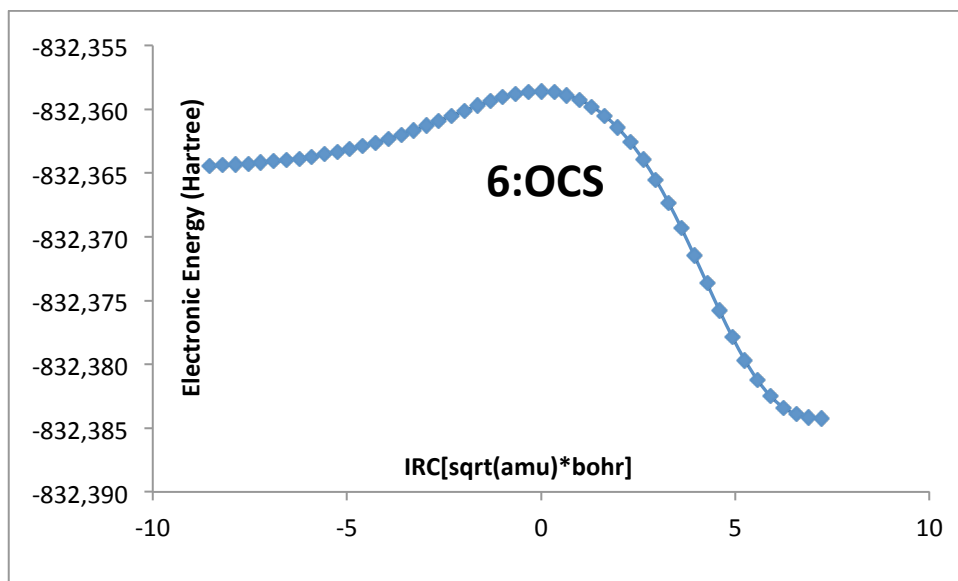

(B) IRC coordinates vs. the total electronic energies for reactions **1-7** + CS<sub>2</sub>. The geometries on the most negative value of the IRC corresponds to the NHC:CS<sub>2</sub> complex while the most positive one corresponds to the NHC-CS<sub>2</sub> molecule.

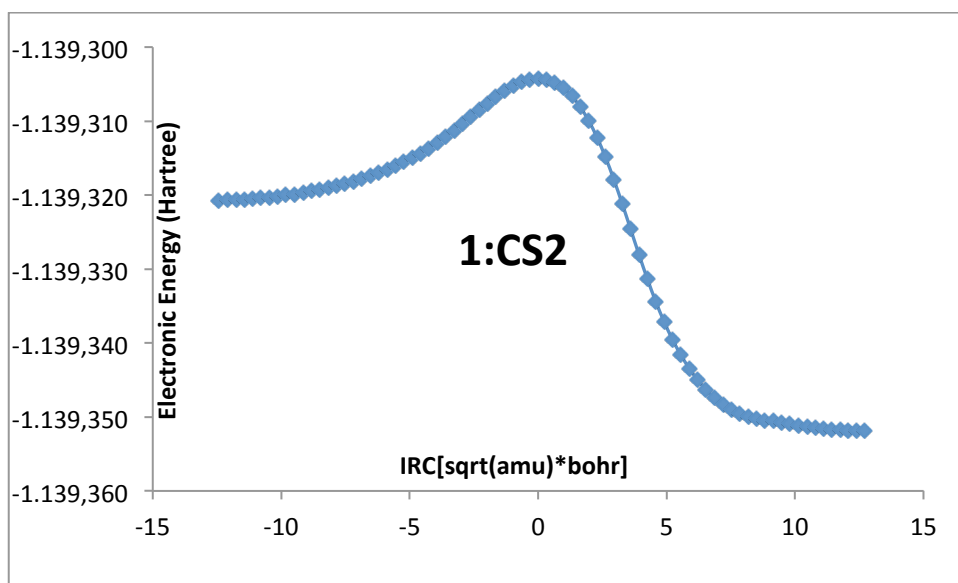

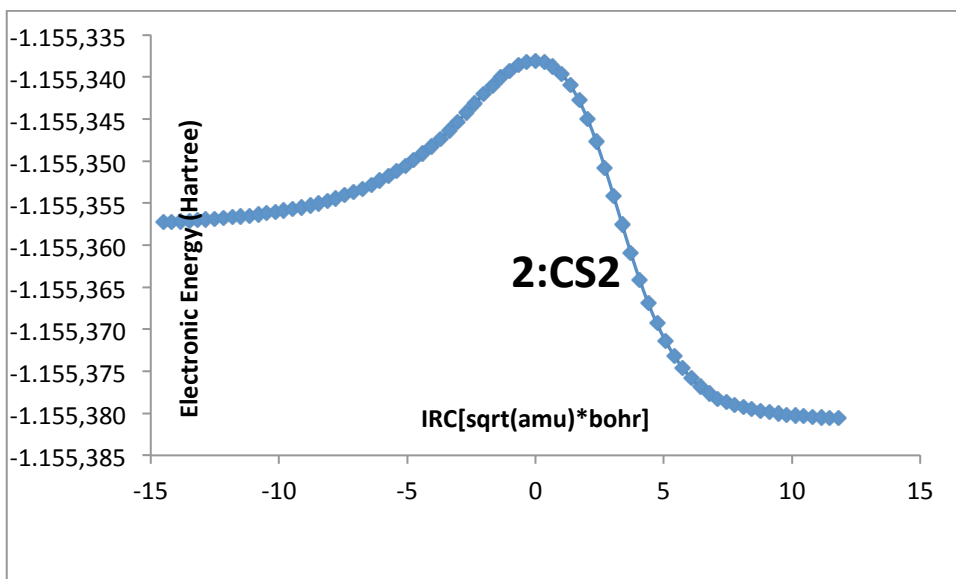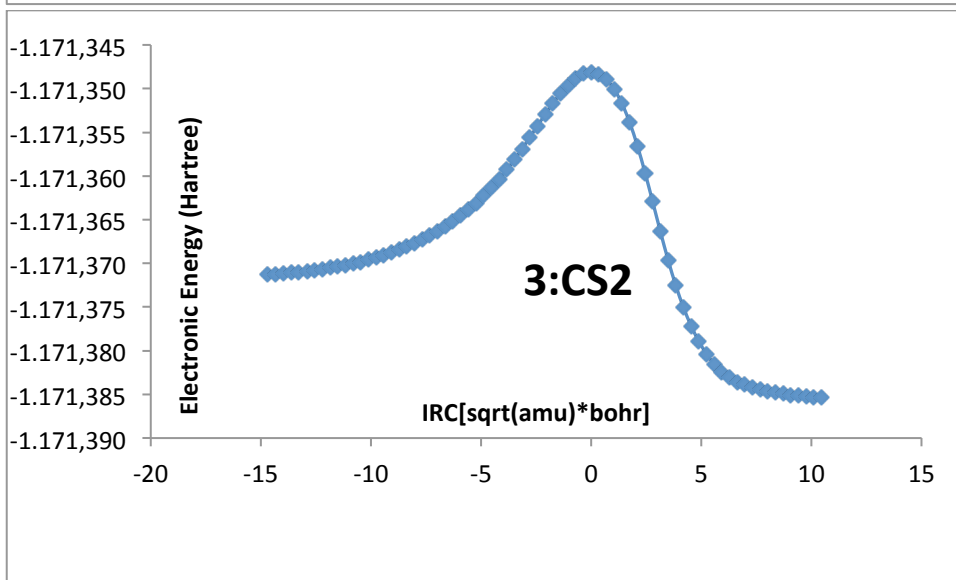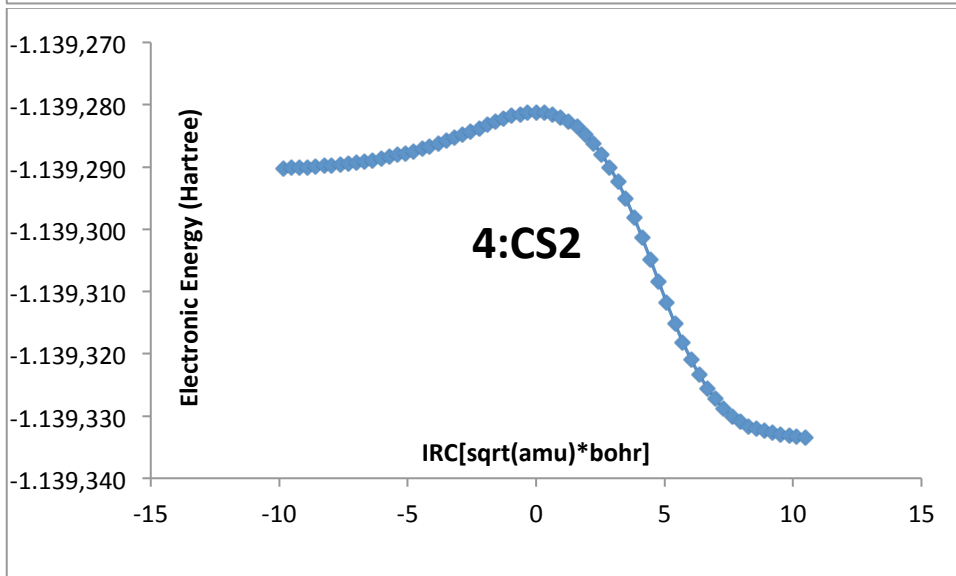

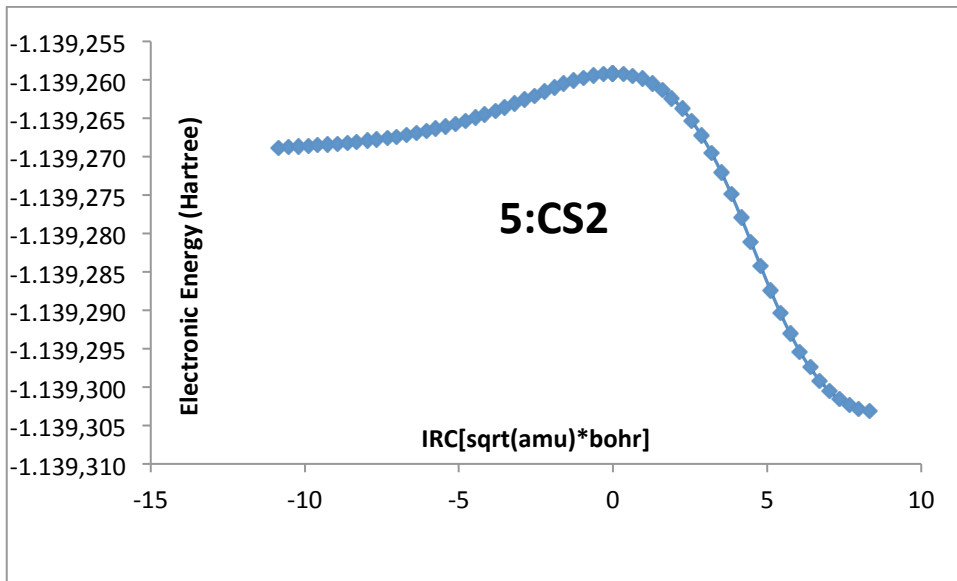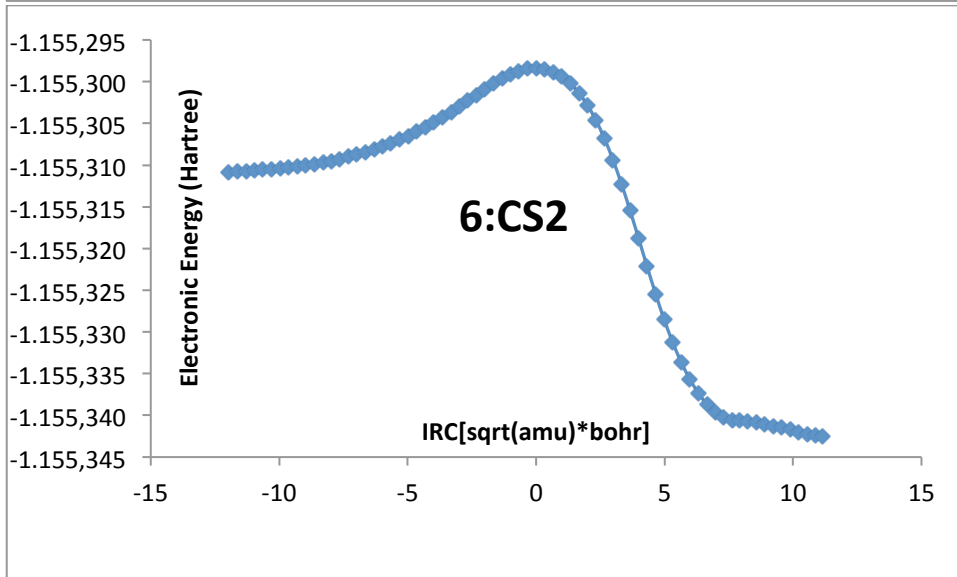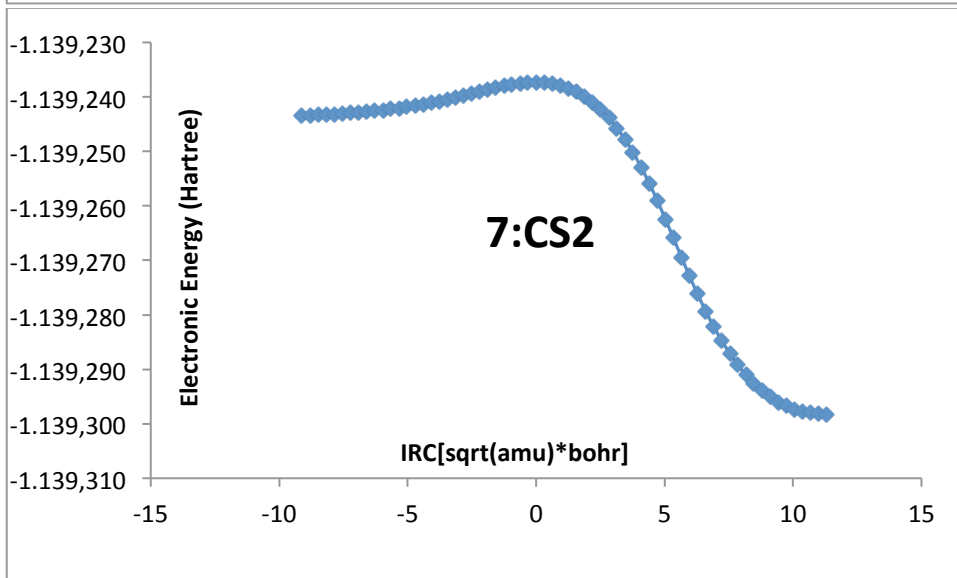

**Figure S2.** CO<sub>2</sub>, OCS and CS<sub>2</sub> LUMO orbitals.

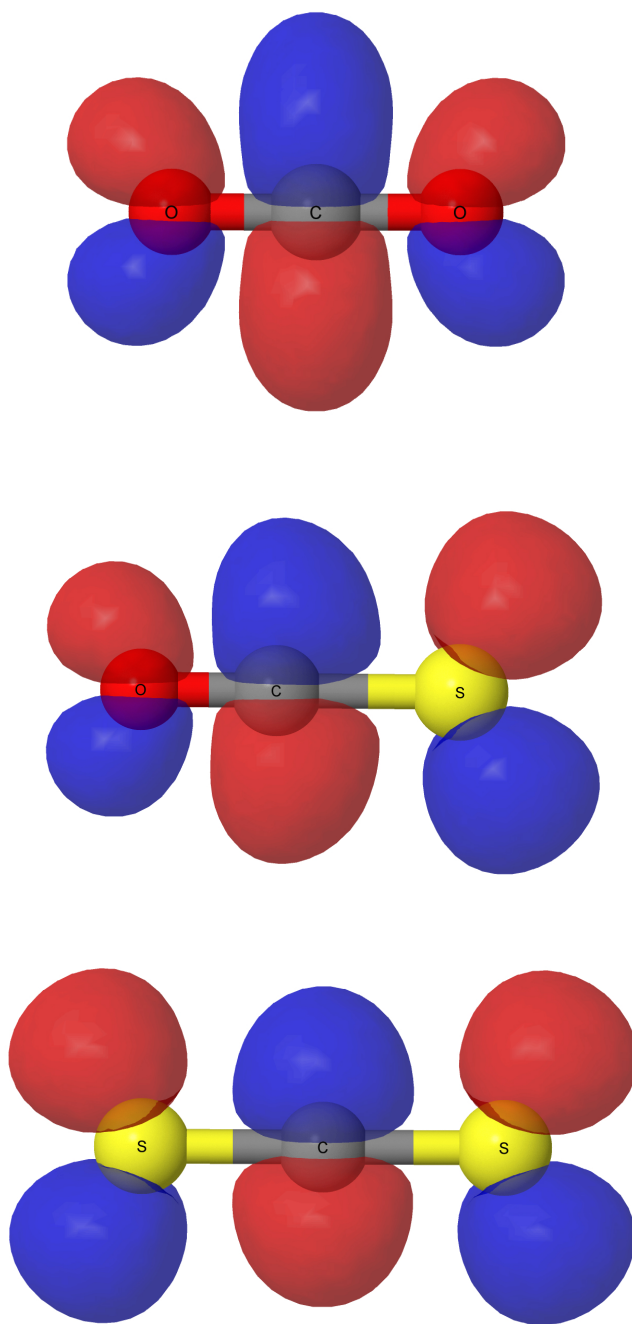

**Figure S3.** Stability of the TSs NHC/CXY (NHC=1-7, CXY = CS<sub>2</sub>, OCS) versus the stability of the TSs NHC/CO<sub>2</sub>.

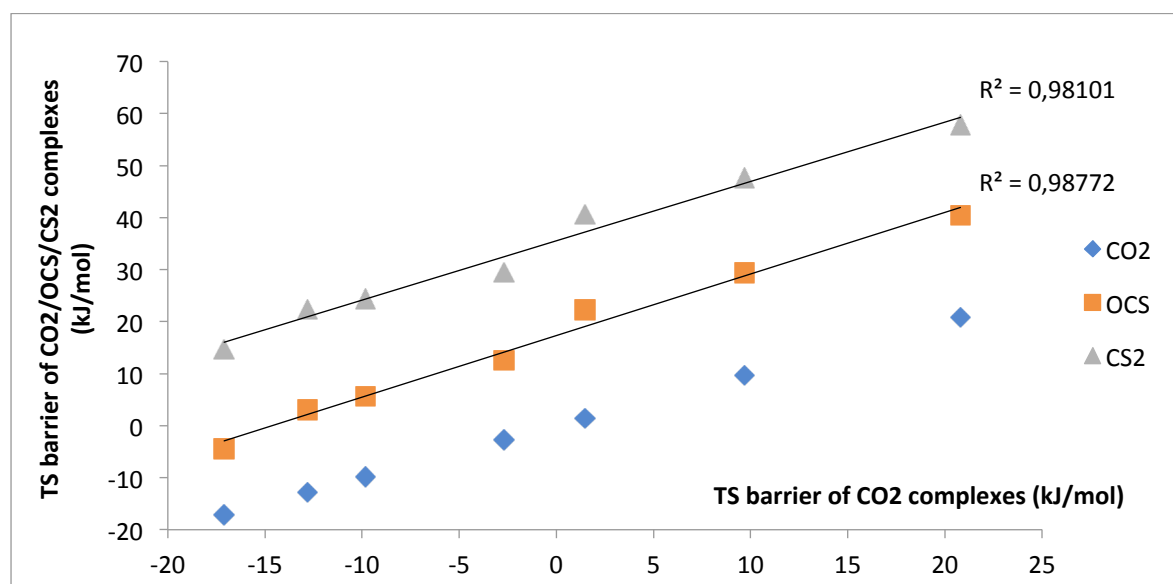



**Figure S4.** Stability of the TSs (kJ/mol) NHC/CXY (NHC=1-7, CXY = CO<sub>2</sub>, CS<sub>2</sub>, OCS) versus C···C distances (Å).

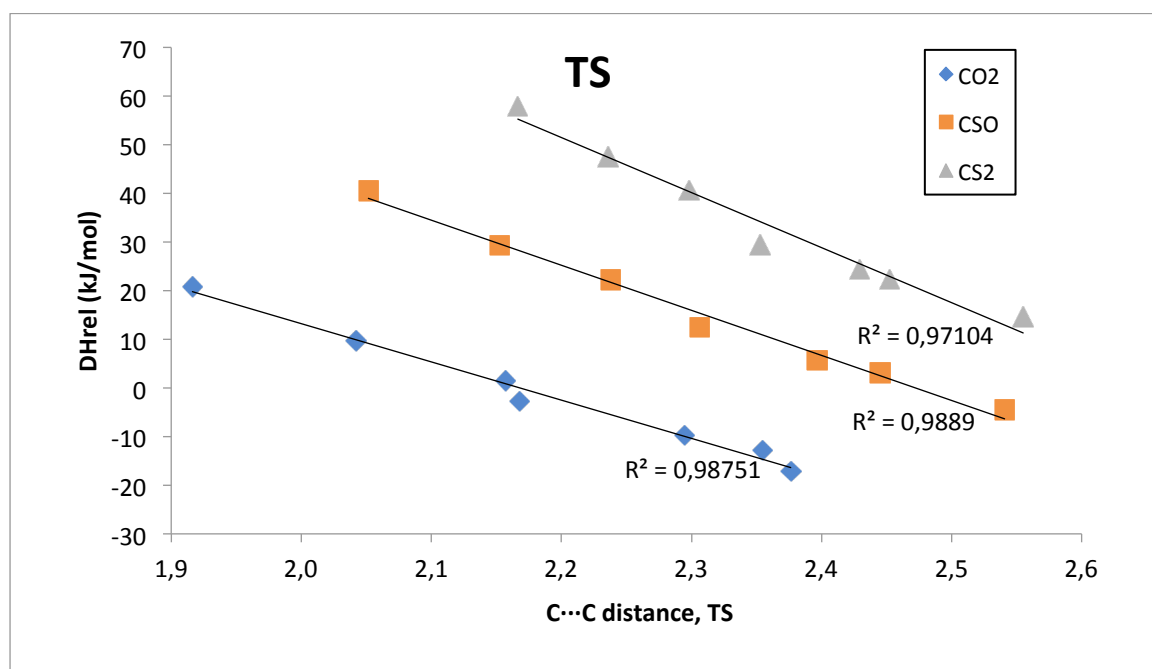

Linear correlations: TS(CO<sub>2</sub>) vs TS(OCS), R<sup>2</sup> = 0.988; TS(CO<sub>2</sub>) vs TS(CS<sub>2</sub>), R<sup>2</sup> = 0.981; TS(OCS) vs. TS(CS<sub>2</sub>), R<sup>2</sup> = 0.998.

**Figure S5.** Relationship between the  $\Delta H$  of the transition states NHC/CXY and products NHC-CXY (NHC = **1-7**, CXY = CO<sub>2</sub>, OCS, CS<sub>2</sub>) with respect to the energy of the HOMO in the isolated **1-7** carbenes. Results regarding CO<sub>2</sub> were taken from Ref. 3.

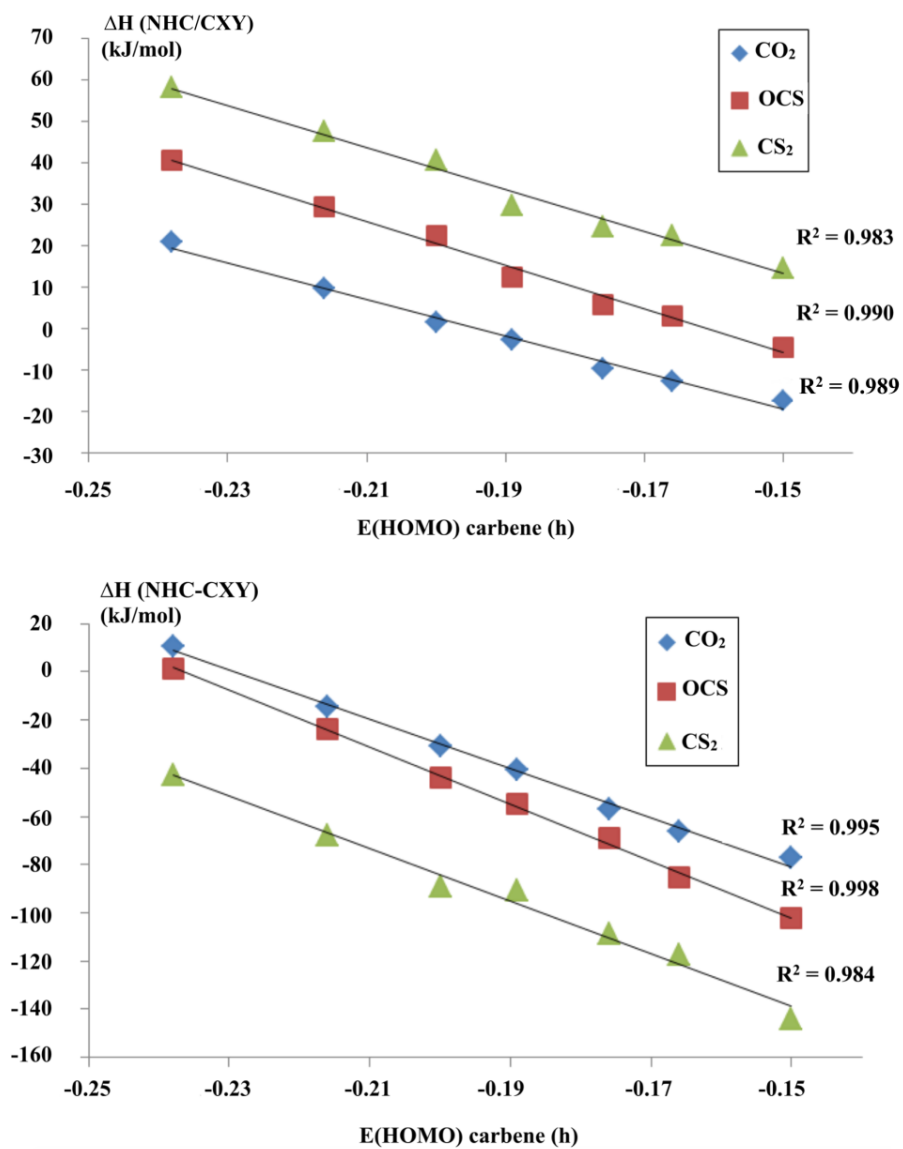

**Figure S6.** Relationship between the  $\Delta H$  of the transition states NHC/CXY and products NHC-CXY (NHC = **1-7**, CXY = CO<sub>2</sub>, OCS, CS<sub>2</sub>) with respect to the minimum of the MEP in the isolated **1-7** carbenes.

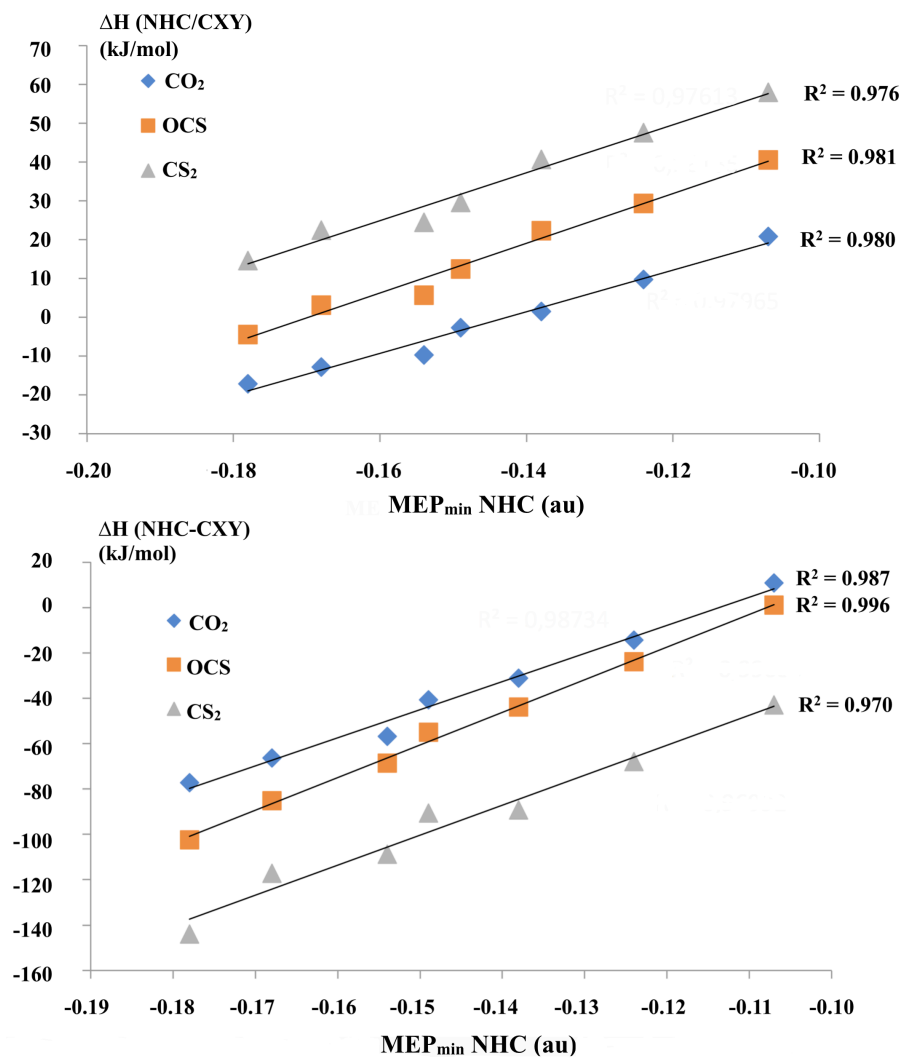

**Figure S7.**  $E_r$  (distortion energy) for the different CXY molecules at the NHC/CXY transition states from the distortion-interaction analysis.

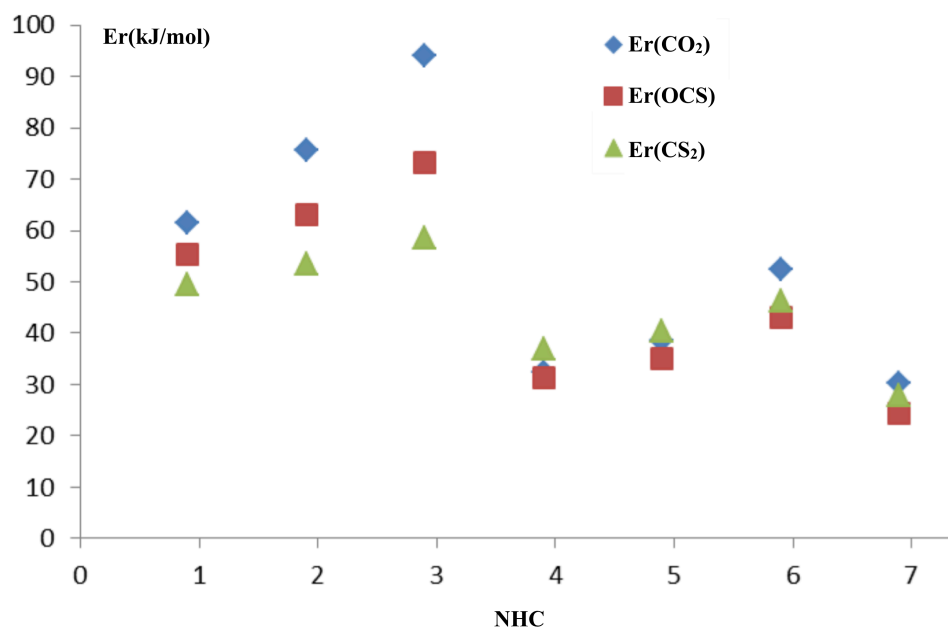

**Figure S8.** Distortion-interaction analysis carried out along the path of the NHC + CXY reactions. Negative and positive values of the IRC correspond to the complexes and adducts, respectively.

Starting from the paths explored with the help of the IRC calculations, we also carried out this distortion-interaction analysis for some selected cases all along the reaction paths. In particular, Figure S6.1 below these lines describes the trends of the different energy terms involved for the **5** + CS<sub>2</sub> reaction, which presents the highest interaction energy at the TS of the CS<sub>2</sub> group of reactions.

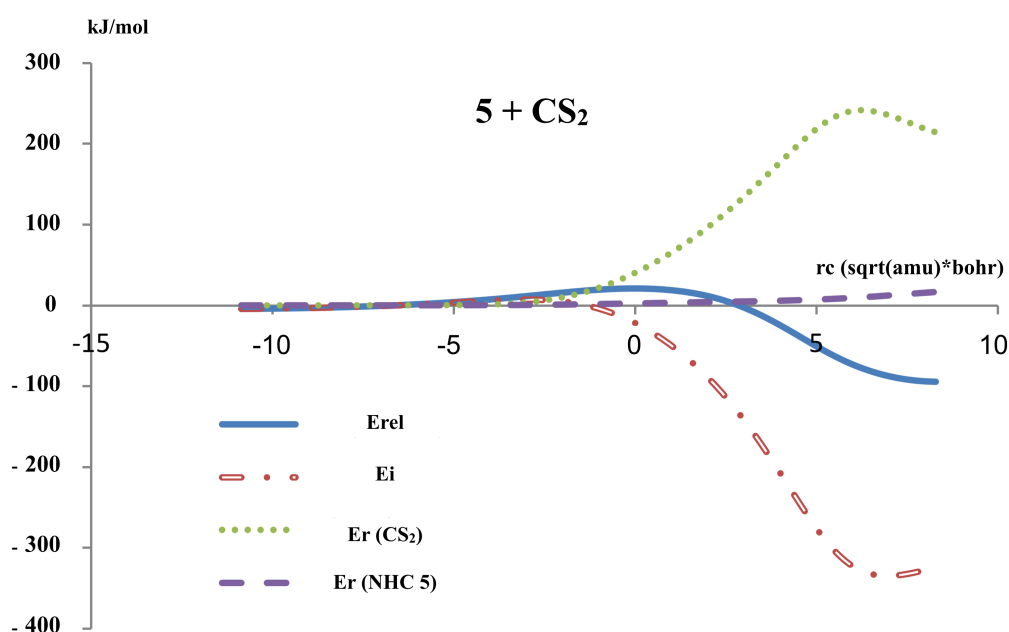

**Figure S6.1** Distortion-interaction analysis carried out along the path of the reaction between the NHC **5** and CS<sub>2</sub>. Notations  $E_{rel}$ ,  $E_i$  and  $E_r$  stand for the total relative energy, the interaction energy and the distortion (repulsive) energy, respectively (kJ/mol).

The energy terms are contained in a narrow interval of energy values before the TS; after that point, they dramatically change as an indication of the formation of the new C-C bond, reaching very large values at the product (positive in the case of the distortion terms, and negative in the case of the interaction energy). Two interesting things come out from the picture: (i) the highest point of the interaction energy is not the TS, (ii) the highest point of the deformation energy for the CS<sub>2</sub> is not the product. This latter point does not apply for the CO<sub>2</sub> case, which continues gaining distortion energy until the final product is reached. The maximum value of the deformation energy of the CS<sub>2</sub> is closed to where the largest C-S bond distance and shortest SCS angles are found along the reaction coordinate. A similar

behaviour is found for some of the NHC + CS<sub>2</sub> and OCS reactions studied for which the complete IRC was obtained (Figures S6.2):

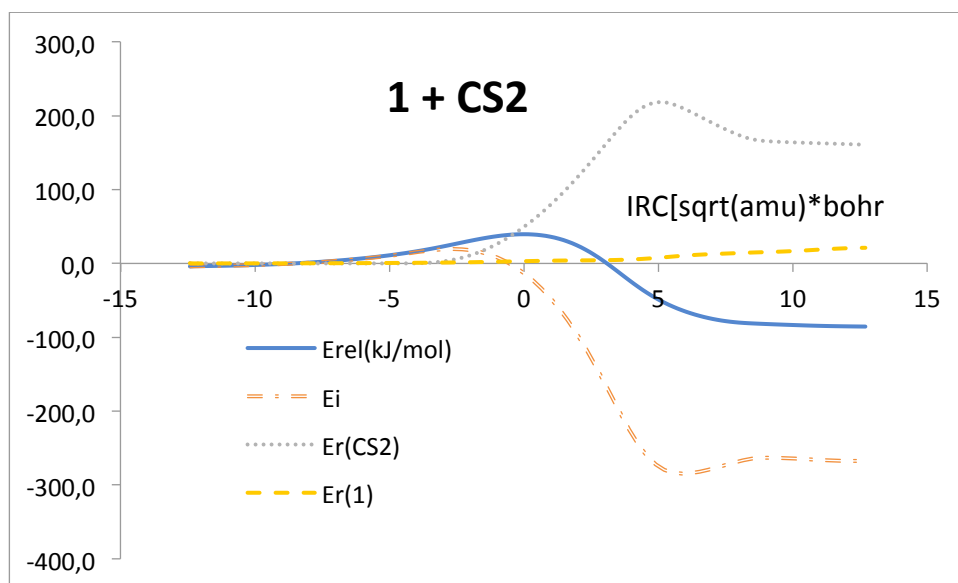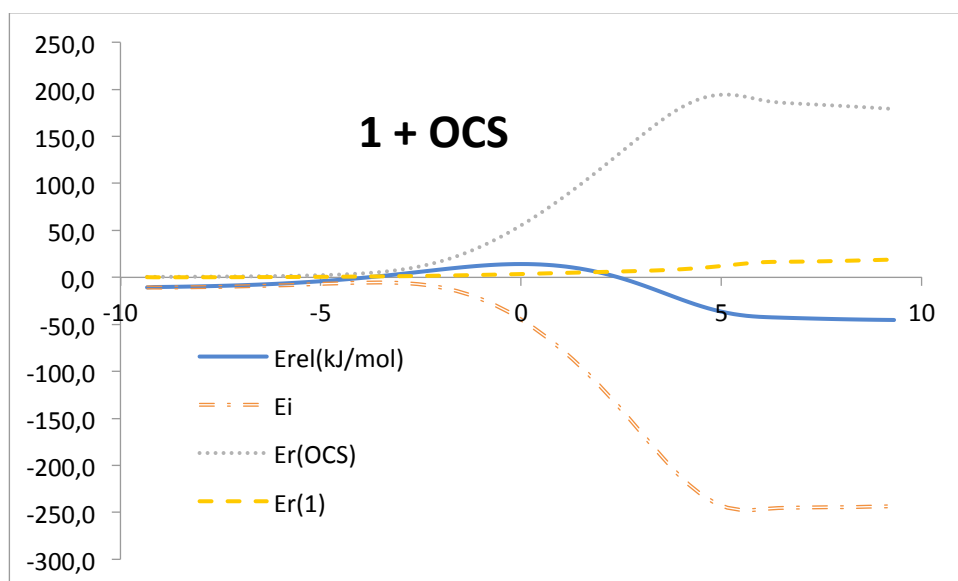

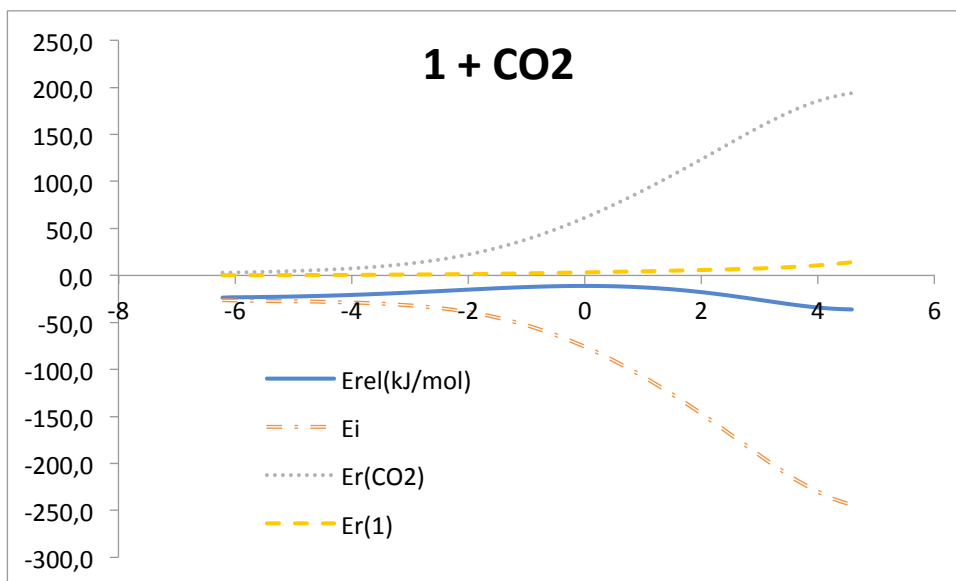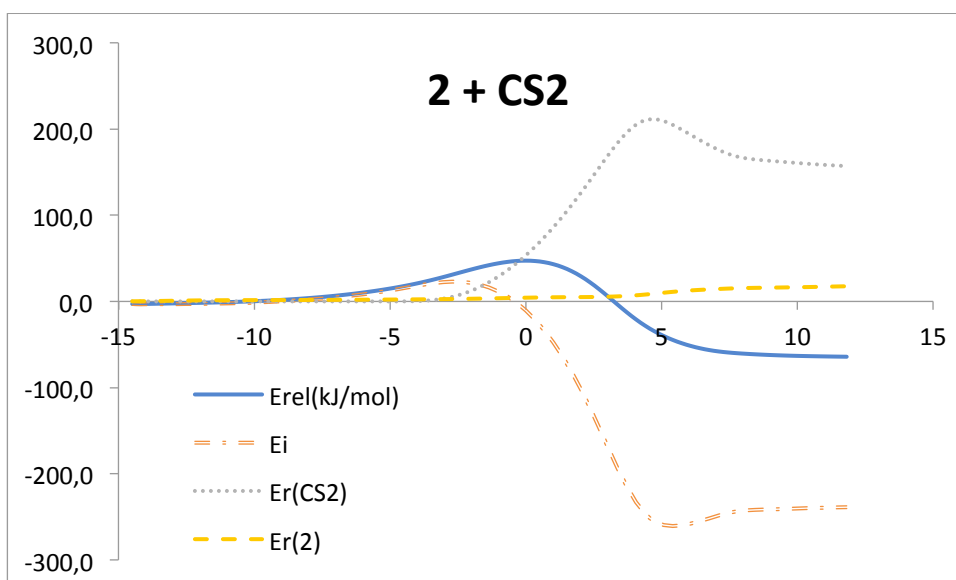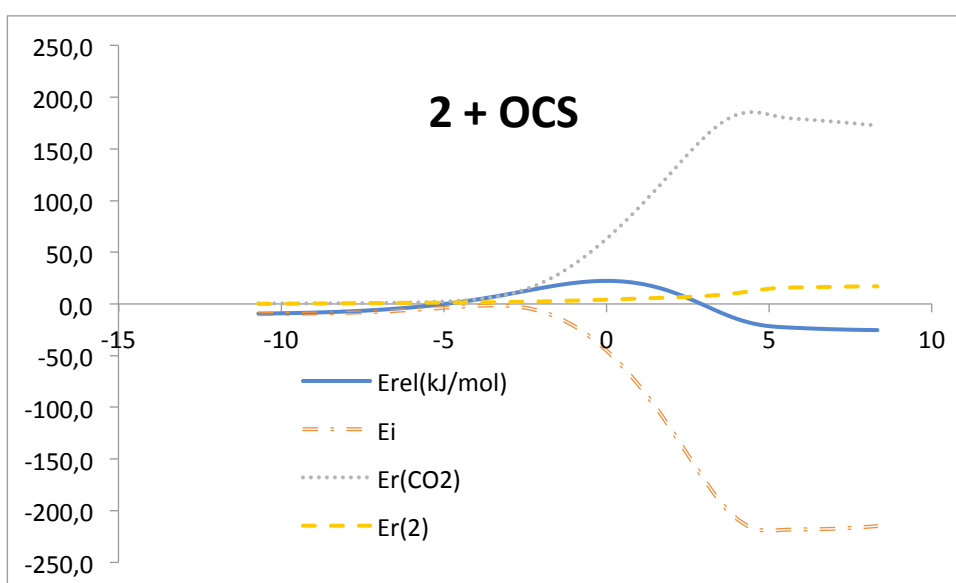

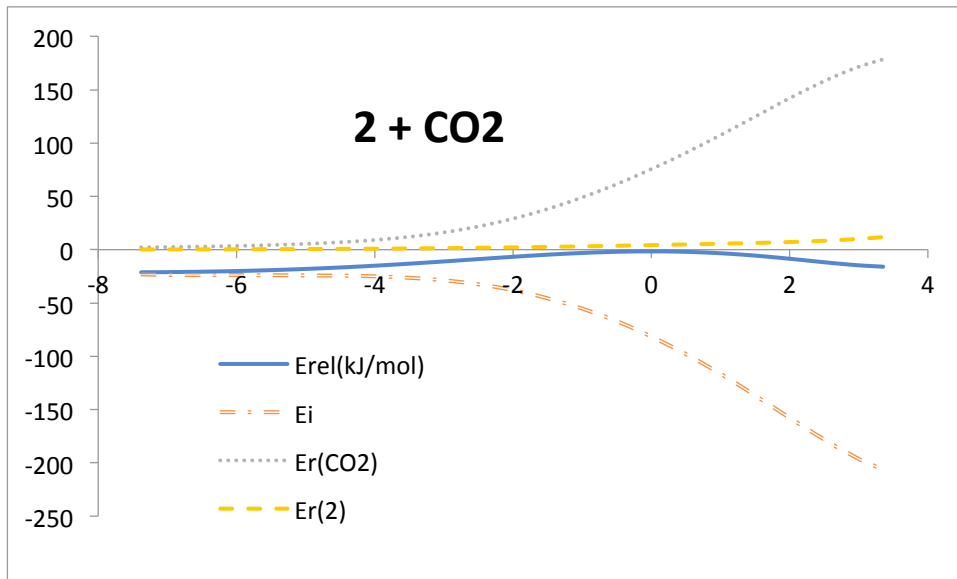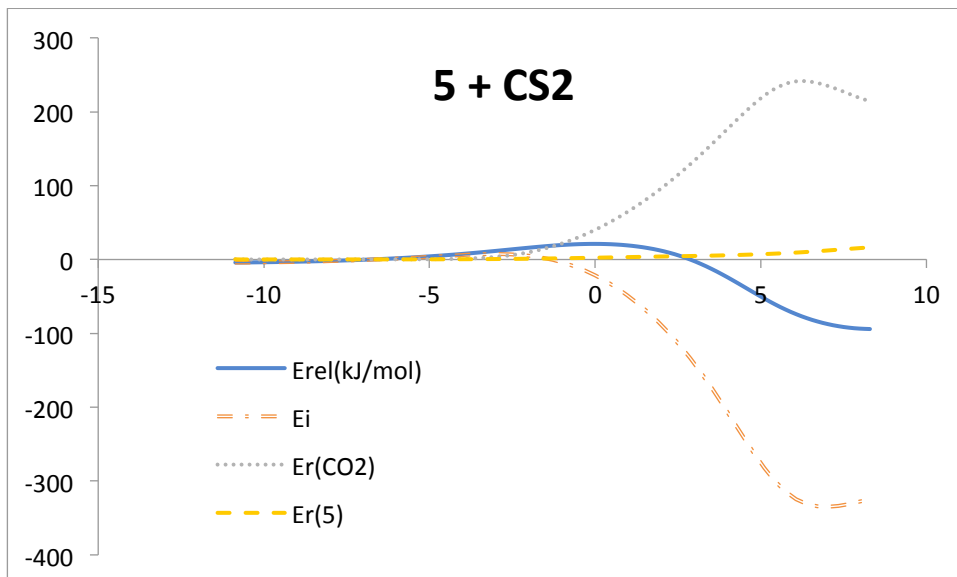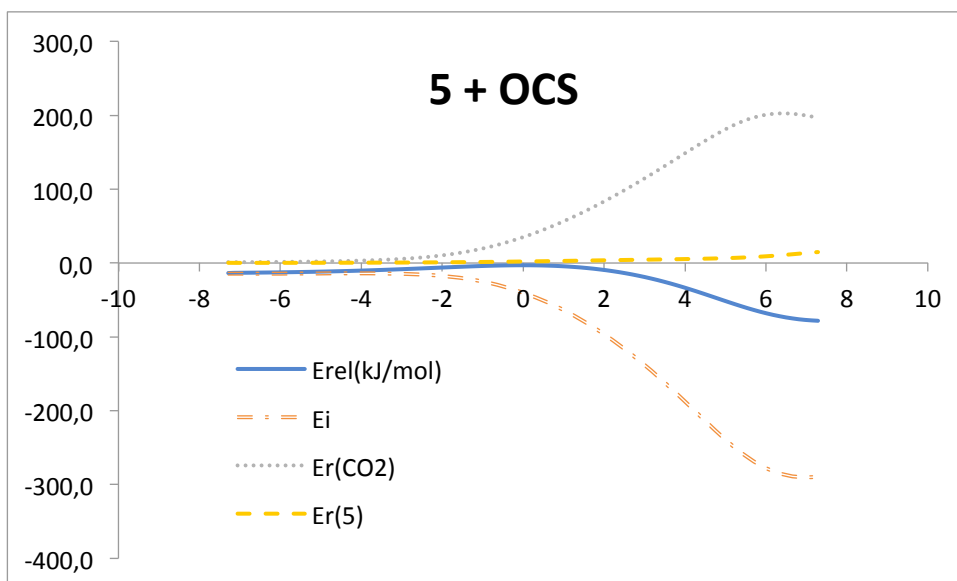



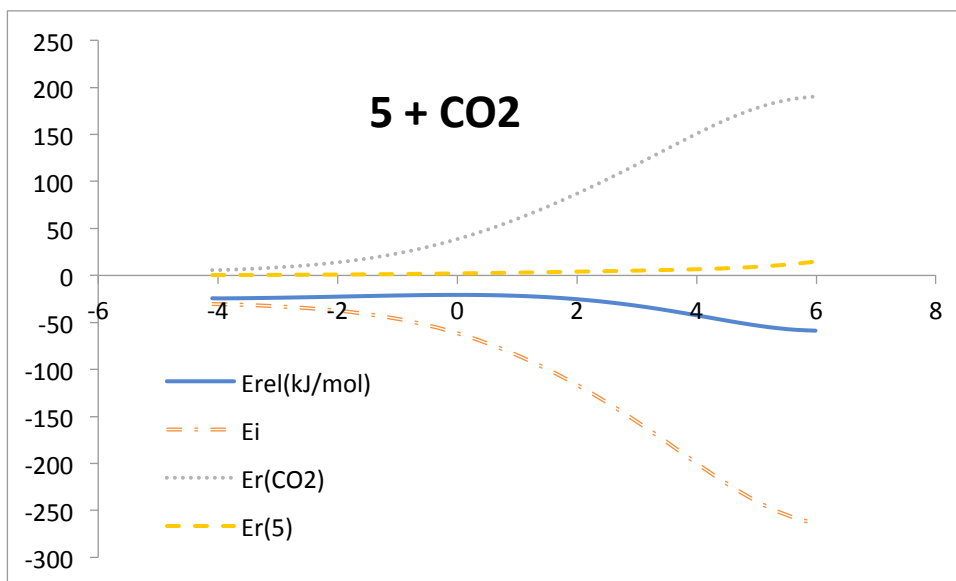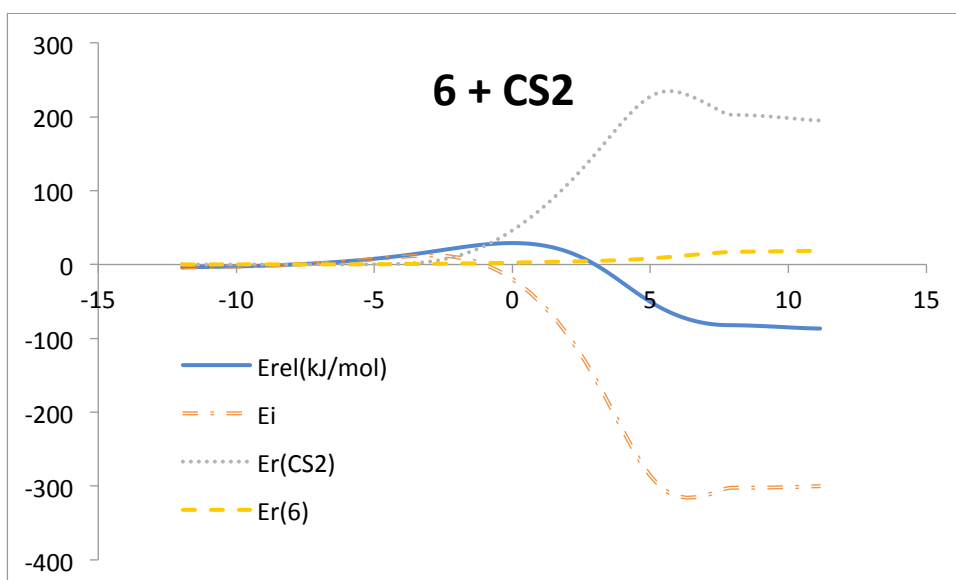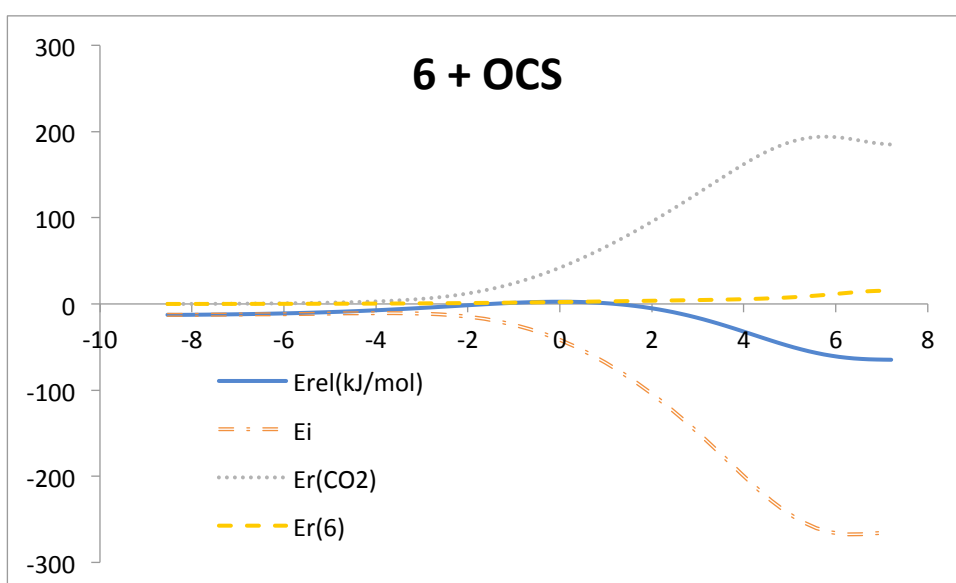

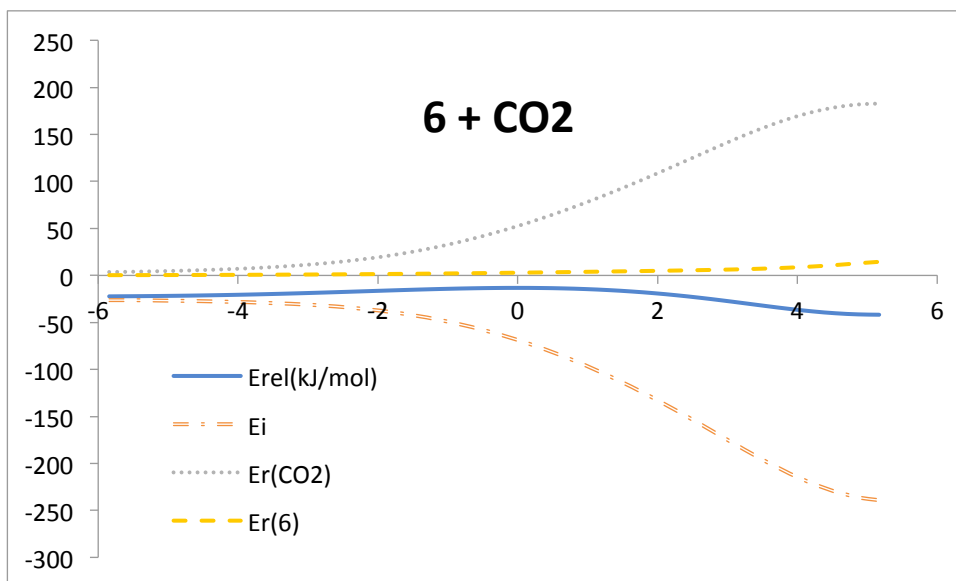

Figures **S6.2**. Distortion-interaction analysis carried out along the path of the reaction between some NHCs and OCS/CS<sub>2</sub>. Notations E<sub>rel</sub>, E<sub>i</sub> and E<sub>r</sub> stand for the total relative energy, the interaction energy and the distortion (repulsive) energy, respectively (kJ/mol).
